# Supplementary material for: Machine learning based analyses on metabolic networks supports high-throughput knockout screens
Source: Springer Nature journal article supplement (doi:10.1186/1752-0509-2-67), 2008-07-24
Supplement: 12918_2008_224_MOESM1_ESM.pdf [file 12918_2008_224_MOESM1_ESM.pdf]

**Content of this file:**

**Supplementary Table S1. List of potential drug targets**

**Supplementary Table S3. Results from our growth experiments**

**Supplementary Table S4. List of the applied primer pairs and our experimental results of testing for correctly knocked out genes**

**Supplementary Table S1. List of potential drug targets**

| EC        | ORF   | Gene symbol | Evidence from the literature                                                                                                                  | Reference                       |
|-----------|-------|-------------|-----------------------------------------------------------------------------------------------------------------------------------------------|---------------------------------|
| 1.1.1.158 | b3972 | murB        | In <i>B. anthracis</i> , antisense dependent MurB2 expression gave synergistic response to beta-lactam antibiotics                            | (Kedar <i>et al</i> , 2007)     |
| 1.3.1.10  | b1288 | fabI        | FabI is a well known drug target against micro-organisms including <i>E. coli</i>                                                             | (Kitagawa <i>et al</i> , 2007)  |
| 2.3.1.15  | b4041 | plsB        | Mutations in plsB occur in <i>E. coli</i> strains with multi-drug tolerance.                                                                  | (Spoering <i>et al</i> , 2006)  |
| 2.3.1.51  | b3018 | plsC        | nothing found                                                                                                                                 |                                 |
| 2.7.1.130 | b0915 | lpxK        | It was shown that growth of <i>E. coli</i> is inhibited when <i>lpxK</i> is inactivated.                                                      | (Garrett <i>et al</i> , 1998)   |
| 2.7.1.26  | b0025 | ribF        | nothing found                                                                                                                                 |                                 |
| 2.7.4.8   | b3648 | gmk         | <i>Salmonella</i> with <i>gmk</i> mutations showed growth dependence on adenine.                                                              | (Beck <i>et al</i> , 2003)      |
| 2.7.7.18  | b0639 | nadD        | nothing found                                                                                                                                 |                                 |
| 2.7.7.2   | b0025 | ribF        | nothing found                                                                                                                                 |                                 |
| 2.7.7.3   | b3634 | coaD        | nothing found                                                                                                                                 |                                 |
| 2.7.7.41  | b0175 | cdsA        | nothing found                                                                                                                                 |                                 |
| 2.7.8.13  | b0087 | mraY        | MraY inhibitors serve as novel antibacterial agents.                                                                                          | (Dini, 2005)                    |
| 2.7.8.5   | b1912 | pgsA        | <i>PgsA</i> codes for an essential enzyme of <i>Mycobacterium smegmatis</i> that shows promise as a drug target for anti-tuberculosis therapy | (Jackson <i>et al</i> , 2000)   |
| 2.7.8.8   | b2585 | pssA        | nothing found                                                                                                                                 |                                 |
| 3.5.1.18  | b2472 | dapE        | <i>Helicobacter</i> strains lacking <i>dapE</i> were dependent on diaminopimelic acid.                                                        | (Karita <i>et al</i> , 1997)    |
| 3.5.4.16  | b2153 | folE        | nothing found                                                                                                                                 |                                 |
| 3.5.4.26  | b0414 | ribD        | nothing found                                                                                                                                 |                                 |
| 3.5.4.9   | b0529 | folD        | nothing found                                                                                                                                 |                                 |
| 4.1.1.65  | b4160 | psd         | <i>Psd</i> null mutants of <i>E. coli</i> were non-motile.                                                                                    | (Karita <i>et al</i> , 1997)    |
| 4.1.2.16  | b1215 | kdsA        | <i>E. coli</i> containing missense mutations in <i>kdsA</i> stopped dividing and cell growth.                                                 | (Fujishima <i>et al</i> , 2002) |
| 4.2.1.52  | b2478 | dapA        | Dihydrodipicolinate synthase (EC 4.2.1.52) is essential for lysine biosynthesis in <i>E. coli</i> .                                           | (Vauterin <i>et al</i> , 2000)  |
| 4.3.1.8   | b3805 | hemC        | nothing found                                                                                                                                 |                                 |
| 4.3.2.2   | b1131 | purB        | <i>PurB</i> mutants of <i>Lotus japonicus</i> exhibit purine auxotrophy.                                                                      | (Okazaki <i>et al</i> , 2007)   |
| 6.1.1.11  | b0893 | serS        | nothing found                                                                                                                                 |                                 |

|          |        |       |                                                                                                                                                     |                                    |
|----------|--------|-------|-----------------------------------------------------------------------------------------------------------------------------------------------------|------------------------------------|
| 6.1.1.12 | b1866  | aspS  | nothing found                                                                                                                                       |                                    |
| 6.1.1.16 | b0526  | cysS  | CysteinyI-tRNA synthetase is essential for protein synthesis                                                                                        | (Bunjun <i>et al</i> , 2000)       |
| 6.1.1.17 | b2400  | gltX  | nothing found                                                                                                                                       |                                    |
| 6.1.1.18 | b0680  | glnS  | nothing found                                                                                                                                       |                                    |
| 6.1.1.19 | b1876  | argS  | Mutations of <i>argS</i> and <i>leuS</i> are found in <i>E. coli</i> strains which are resistant to the antibiotic novobiocin.                      | (Jovanovic <i>et al</i> , 1999)    |
| 6.1.1.2  | b3384  | trpS  | nothing found                                                                                                                                       |                                    |
| 6.1.1.20 | b1713, | pheT, | nothing found                                                                                                                                       |                                    |
|          | b1714  | pheS  |                                                                                                                                                     |                                    |
| 6.1.1.21 | b2514  | hisS  | Mutants expressing a structurally altered HisS protein require external histidine.                                                                  | (Straus and Ames, 1973)            |
| 6.1.1.22 | b0930  | asnS  | AsnS inhibitors are used as anticancer drugs.                                                                                                       | (Richards and Kilberg, 2006)       |
| 6.1.1.4  | b0642  | leuS  | Mutations of <i>argS</i> and <i>leuS</i> are found in <i>E. coli</i> strains which are resistant to the antibiotic novobiocin.                      | (Jovanovic <i>et al</i> , 1999)    |
| 6.1.1.9  | b4258  | valS  | nothing found                                                                                                                                       |                                    |
| 6.3.2.13 | b0085  | murE  | <i>S. aureus</i> strains which are resistant against the antibiotic methicillin show mutations in murE which is needed for cell wall synthesis.     | (De Lencastre <i>et al</i> , 1999) |
| 6.3.2.15 | b0086  | murF  | 4-phenylpiperidine was reported to inhibit the MurF enzyme and may contribute to antibacterial activity by interfering with cell wall biosynthesis. | (Baum <i>et al</i> , 2007)         |

### References for Supplementary Table S1

Baum EZ, Crespo-Carbone SM, Klinger A, Foleno BD, Turchi I, Macielag M, Bush K (2007) A MurF inhibitor that disrupts cell wall biosynthesis in *Escherichia coli*. *Antimicrobial agents and chemotherapy* **51**: 4420-4426.

Beck BJ, Huelsmeyer M, Paul S, Downs DM (2003) A mutation in the essential gene *gmk* (encoding guanlyate kinase) generates a requirement for adenine at low temperature in *Salmonella enterica*. *Journal of bacteriology* **185**: 6732-6735.

Bunjun S, Stathopoulos C, Graham D, Min B, Kitabatake M, Wang AL, Wang CC, Vivares CP, Weiss LM, Soll D (2000) A dual-specificity aminoacyl-tRNA synthetase in the deep-rooted eukaryote *Giardia lamblia*. *Proceedings of the National Academy of Sciences of the United States of America* **97**: 12997-13002.

De Lencastre H, Wu SW, Pinho MG, Ludovice AM, Filipe S, Gardete S, Sobral R, Gill S, Chung M, Tomasz A (1999) Antibiotic resistance as a stress response: complete sequencing of a large number of chromosomal loci in *Staphylococcus aureus* strain COL that impact on the expression of resistance to methicillin. *Microbial drug resistance (Larchmont, NY)* **5**: 163-175.

Dini C (2005) MraY Inhibitors as Novel Antibacterial Agents. *Current topics in medicinal chemistry* **5**: 1221-1236.

- Fujishima H, Nishimura A, Wachi M, Takagi H, Hirasawa T, Teraoka H, Nishimori K, Kawabata T, Nishikawa K, Nagai K (2002) *kdsA* mutations affect FtsZ-ring formation in Escherichia coli K-12. *Microbiology (Reading, England)* **148**: 103-112.
- Garrett TA, Que NL, Raetz CR (1998) Accumulation of a lipid A precursor lacking the 4'-phosphate following inactivation of the Escherichia coli *lpxK* gene. *The Journal of biological chemistry* **273**: 12457-12465.
- Jackson M, Crick DC, Brennan PJ (2000) Phosphatidylinositol is an essential phospholipid of mycobacteria. *The Journal of biological chemistry* **275**: 30092-30099.
- Jovanovic M, Lilic M, Janjusevic R, Jovanovic G, Savic DJ (1999) tRNA synthetase mutants of Escherichia coli K-12 are resistant to the gyrase inhibitor novobiocin. *Journal of bacteriology* **181**: 2979-2983.
- Karita M, Etterbeek ML, Forsyth MH, Tummuru MK, Blaser MJ (1997) Characterization of Helicobacter pylori *dapE* and construction of a conditionally lethal *dapE* mutant. *Infection and immunity* **65**: 4158-4164.
- Kedar GC, Brown-Driver V, Reyes DR, Hilgers MT, Stidham MA, Shaw KJ, Finn J, Haselbeck RJ (2007) Evaluation of the *metS* and *murB* loci for antibiotic discovery using targeted antisense RNA expression analysis in Bacillus anthracis. *Antimicrobial agents and chemotherapy* **51**: 1708-1718.
- Kitagawa H, Kumura K, Takahata S, Iida M, Atsumi K (2007) 4-Pyridone derivatives as new inhibitors of bacterial enoyl-ACP reductase FabI. *Bioorganic & medicinal chemistry* **15**: 1106-1116.
- Okazaki S, Hattori Y, Saeki K (2007) The Mesorhizobium loti *purB* gene is involved in infection thread formation and nodule development in Lotus japonicus. *Journal of bacteriology* **189**: 8347-8352.
- Richards NG, Kilberg MS (2006) Asparagine Synthetase Chemotherapy. *Annu Rev Biochem.*
- Spoering AL, Vulic M, Lewis K (2006) GlpD and PlsB participate in persister cell formation in Escherichia coli. *Journal of bacteriology* **188**: 5136-5144.
- Straus DS, Ames BN (1973) Histidyl-transfer ribonucleic acid synthetase mutants requiring a high internal pool of histidine for growth. *Journal of bacteriology* **115**: 188-197.
- Vauterin M, Frankard V, Jacobs M (2000) Functional rescue of a bacterial *dapA* auxotroph with a plant cDNA library selects for mutant clones encoding a feedback-insensitive dihydrodipicolinate synthase. *Plant J* **21**: 239-248.

### Supplementary Table S3. Results from our growth experiments

Shown are the columns running number, ORF-id, gene symbol, our experimental results, classified according to OD600 (minus: < 0.07, no growth; plus/minus: between 0.07 and 0.2, slow growth; plus: > 0.2: growth), our OD600 after 48 hours (measured in duplicate), and OD600 in glucose MOPS medium with 2nM Pi conditions after 24 hours as given by Baba et al. (2006).

| #  | ORFs  | Gene | Our<br>experimental<br>result | our OD600<br>(48 hours) | OD600 of<br>Baba et al.<br>(24 hours) |
|----|-------|------|-------------------------------|-------------------------|---------------------------------------|
| 1  | b1638 | pdxH | -                             | 0.001                   | 0.005                                 |
| 2  | b3870 | glnA | -                             | 0.000                   | 0.005                                 |
| 3  | b2913 | serA | -                             | 0.002                   | 0.007                                 |
| 4  | b2508 | guaB | -                             | 0.005                   | 0.005                                 |
| 5  | b3772 | ilvA | -                             | 0.001                   | 0.014                                 |
| 6  | b2551 | glyA | -                             | 0.000                   | 0.002                                 |
| 7  | b1136 | icd  | -                             | 0.003                   | 0.029                                 |
| 8  | b0002 | thrA | -                             | 0.029                   | 0.023                                 |
| 9  | b0032 | carA | +                             | 0.432                   | 0.003                                 |
| 10 | b3008 | metC | +/-                           | 0.152                   | 0.029                                 |
| 11 | b0720 | gltA | -                             | 0.032                   | 0.014                                 |
| 12 | b1264 | trpE | -                             | 0.016                   | 0.02                                  |
| 13 | b0033 | carB | -                             | 0.029                   | 0                                     |
| 14 | b2530 | iscS | +/-                           | 0.084                   | 0.028                                 |
| 15 | b2416 | ptsI | -                             | 0.039                   | 0.018                                 |

---

|    |          |      |     |       |       |
|----|----------|------|-----|-------|-------|
| 16 | b0115    | aceF | +/- | 0.070 | 0.091 |
| 17 | b0116    | lpd  | -   | 0.000 | 0.061 |
| 18 | b0242    | proB | -   | 0.045 | 0.003 |
| 19 | b2415    | ptsH | +   | 0.747 | 0.066 |
| 20 | b3829    | metE | -   | 0.008 | 0.008 |
| 21 | b3916    | pfkA | -   | 0.018 | 0.087 |
| 22 | b4388    | serB | -   | 0.019 | 0.009 |
| 23 | b0243    | proA | -   | 0.006 | 0.007 |
| 24 | b0775    | bioB | +   | 0.959 | 0.049 |
| 25 | b0776    | bioF | +   | 0.795 | 0.025 |
| 26 | b0778    | bioD | +   | 1.15  | 0.037 |
| 27 | b3731    | atpC | +   | 0.833 | 0.038 |
| 28 | b3737    | atpE | +   | 0.671 | 0.016 |
| 29 | b1260    | trpA | -   | 0.029 | 0.008 |
| 30 | b1261    | trpB | -   | 0.003 | 0.008 |
| 31 | b3281    | aroE | -   | 0.001 | 0.007 |
| 32 | b3738    | atpB | +   | 0.989 | 0.014 |
| 33 | b3940    | metL | -   | 0.000 | 0.011 |
| 34 | wildtype |      | +   | 0.702 |       |

---

**Supplementary Table S4. List of the applied primer pairs and our experimental results of testing for correctly knocked out genes**

| #  | ORFs  | Gene | %correct | Experimental result | fwd primer                 | rev primer                   |
|----|-------|------|----------|---------------------|----------------------------|------------------------------|
| 1  | b0103 | coaE | 25%      | 2 PCR-bands         | 5'-aaggtaagagcgcaactcc-3'  | 5'-tggcaatccaggtttctacc-3'   |
| 2  | b2697 | alaS | 25%      | 2 PCR-bands         | 5'-ccgactgaacgcatacgg-3'   | 5'-tacctggtgcccttacc-3'      |
| 3  | b3559 | glyS | 25%      | 2 PCR-bands         | 5'-acattcaggcgtagacagc-3'  | 5'-tctgccttcggtgaatacc-3'    |
| 4  | b3974 | coaA | 25%      | 2 PCR-bands         | 5'-aagtagcgcgattctatgg-3'  | 5'-acgcggaatagacaacagg-3'    |
| 5  | b3997 | hemE | 37.50%   | 2 PCR-bands         | 5'-gccgtgagcgttactacc-3'   | 5'-agagcgggtcgaattacc-3'     |
| 6  | b0928 | aspC | 100%     | correct k.o.        | 5'-gacaacaactggcgtagg-3'   | 5'-ctggattctggcaaagtgc-3'    |
| 7  | b2687 | luxS | 100%     | correct k.o.        | 5'-cccgatctgactttctctgc-3' | 5'-ctatcggcacgtcgataacc-3'   |
| 8  | b2927 | epd  | 100%     | correct k.o.        | 5'-gccggtatcacttcacaagc-3' | 5'-cttctgccttgtgaagc-3'      |
| 9  | b3993 | thiE | 100%     | correct k.o.        | 5'-tacctgcgtaaggaggaagc-3' | 5'-actgtgcagtcgctgttg-3'     |
| 10 | b0026 | ileS | 25%      | no PCR product      | 5'-gttgcaatggaccttacgg-3'  | 5'-gctaataccaatcgcaataccg-3' |
