# Supplementary material for: Machine learning based analyses on metabolic networks supports high-throughput knockout screens
Source: Springer Nature journal article supplement (doi:10.1186/1752-0509-2-67), 2008-07-24
Supplement: 12918_2008_224_MOESM2_ESM.pdf [file 12918_2008_224_MOESM2_ESM.pdf]

### Supplementary Table S2 Results of all Reactions

Given are the essentiality predictions due to the experiment in LB rich medium (KEIO), flux balance analyses for reactions (FBA) and our machine learning approach (ML)

| EC number | Reaction ID        | Keio | FBA | ML  | GPR association                               | Drugbank ID |
|-----------|--------------------|------|-----|-----|-----------------------------------------------|-------------|
|           | R_14GLUCANabc<br>p | no   | no  | no  | ( b4034 and b4033<br>and b4032 and<br>b4035 ) | -           |
|           | R_14GLUCANtexi     | no   | no  | no  | b4036                                         | -           |
| 3.1.4.16  | R_23PDE2pp         | no   | no  | no  | b4213                                         | -           |
| 3.1.4.16  | R_23PDE4pp         | no   | no  | no  | b4213                                         | -           |
| 3.1.4.16  | R_23PDE7pp         | no   | no  | no  | b4213                                         | -           |
| 3.1.4.16  | R_23PDE9pp         | no   | no  | no  | b4213                                         | -           |
|           | R_2AGPA120tipp     | no   | no  | no  | b2835                                         | -           |
|           | R_2AGPA140tipp     | no   | no  | no  | b2835                                         | -           |
|           | R_2AGPA141tipp     | no   | no  | no  | b2835                                         | -           |
|           | R_2AGPA160tipp     | no   | no  | no  | b2835                                         | -           |
|           | R_2AGPA161tipp     | no   | no  | no  | b2835                                         | -           |
|           | R_2AGPA180tipp     | no   | no  | no  | b2835                                         | -           |
|           | R_2AGPA181tipp     | no   | no  | no  | b2835                                         | -           |
|           | R_2AGPE120tipp     | no   | no  | no  | b2835                                         | -           |
|           | R_2AGPE140tipp     | no   | no  | no  | b2835                                         | -           |
|           | R_2AGPE141tipp     | no   | no  | no  | b2835                                         | -           |
|           | R_2AGPE160tipp     | no   | no  | no  | b2835                                         | -           |
|           | R_2AGPE161tipp     | no   | no  | no  | b2835                                         | -           |
|           | R_2AGPE180tipp     | no   | no  | no  | b2835                                         | -           |
|           | R_2AGPE181tipp     | no   | no  | no  | b2835                                         | -           |
| 2.3.1.40  | R_2AGPEAT120       | no   | no  | no  | b2836                                         | -           |
| 2.3.1.40  | R_2AGPEAT140       | no   | no  | no  | b2836                                         | -           |
| 2.3.1.40  | R_2AGPEAT141       | no   | no  | no  | b2836                                         | -           |
| 2.3.1.40  | R_2AGPEAT160       | no   | no  | no  | b2836                                         | -           |
| 2.3.1.40  | R_2AGPEAT161       | no   | no  | no  | b2836                                         | -           |
| 2.3.1.40  | R_2AGPEAT180       | no   | no  | no  | b2836                                         | -           |
| 2.3.1.40  | R_2AGPEAT181       | no   | no  | no  | b2836                                         | -           |
|           | R_2AGPG120tipp     | no   | no  | no  | b2835                                         | -           |
|           | R_2AGPG140tipp     | no   | no  | no  | b2835                                         | -           |
|           | R_2AGPG141tipp     | no   | no  | no  | b2835                                         | -           |
|           | R_2AGPG160tipp     | no   | no  | no  | b2835                                         | -           |
|           | R_2AGPG161tipp     | no   | no  | no  | b2835                                         | -           |
|           | R_2AGPG180tipp     | no   | no  | no  | b2835                                         | -           |
|           | R_2AGPG181tipp     | no   | no  | no  | b2835                                         | -           |
| 2.3.1.40  | R_2AGPGAT120       | no   | no  | no  | b2836                                         | -           |
| 2.3.1.40  | R_2AGPGAT140       | no   | no  | no  | b2836                                         | -           |
| 2.3.1.40  | R_2AGPGAT141       | no   | no  | no  | b2836                                         | -           |
| 2.3.1.40  | R_2AGPGAT160       | no   | no  | no  | b2836                                         | -           |
| 2.3.1.40  | R_2AGPGAT161       | no   | no  | no  | b2836                                         | -           |
| 2.3.1.40  | R_2AGPGAT180       | no   | no  | no  | b2836                                         | -           |
| 2.3.1.40  | R_2AGPGAT181       | no   | no  | no  | b2836                                         | -           |
|           | R_2DGLCNRx         | no   | no  | no  | b3553                                         | -           |
| 1.1.1.215 | R_2DGLCNry         | no   | no  | no  | b3553                                         | -           |
|           | R_2DGULRx          | no   | no  | no  | b3553                                         | -           |
|           | R_2DGULRy          | no   | no  | no  | b3553                                         | -           |
|           | R_3HCINNMH         | no   | no  | no  | b0347                                         | -           |
|           | R_3HPPPNH          | no   | no  | no  | b0347                                         | -           |
|           | R_3KGK             | no   | no  | no  | b3580                                         | -           |
|           | R_3NTD2pp          | no   | no  | no  | b4213                                         | -           |
|           | R_3NTD4pp          | no   | no  | no  | b4213                                         | -           |
|           | R_3NTD7pp          | no   | no  | no  | b4213                                         | -           |
|           | R_3NTD9pp          | no   | no  | no  | b4213                                         | -           |
| 1.1.1.100 | R_3OAR100          | yes  | yes | yes | b1093                                         | DB03461,    |
| 1.1.1.100 | R_3OAR120          | yes  | yes | yes | b1093                                         | DB03461,    |
| 1.1.1.100 | R_3OAR121          | yes  | yes | yes | b1093                                         | DB03461,    |

|           |               |     |     |     |                                                                            |                                                          |
|-----------|---------------|-----|-----|-----|----------------------------------------------------------------------------|----------------------------------------------------------|
| 1.1.1.100 | R_3OAR140     | yes | yes | yes | b1093                                                                      | DB03461,                                                 |
| 1.1.1.100 | R_3OAR141     | yes | yes | yes | b1093                                                                      | DB03461,                                                 |
| 1.1.1.100 | R_3OAR160     | yes | yes | yes | b1093                                                                      | DB03461,                                                 |
| 1.1.1.100 | R_3OAR161     | yes | yes | yes | b1093                                                                      | DB03461,                                                 |
| 1.1.1.100 | R_3OAR180     | yes | no  | no  | b1093                                                                      | DB03461,                                                 |
| 1.1.1.100 | R_3OAR181     | yes | no  | yes | b1093                                                                      | DB03461,                                                 |
| 1.1.1.100 | R_3OAR40      | yes | yes | no  | b1093                                                                      | DB03461,                                                 |
| 1.1.1.100 | R_3OAR60      | yes | yes | yes | b1093                                                                      | DB03461,                                                 |
| 1.1.1.100 | R_3OAR80      | yes | yes | yes | b1093                                                                      | DB03461,                                                 |
| 2.3.1.41  | R_3OAS121     | yes | yes | yes | b2323                                                                      | DB02039,DB02316,DB03264,DB03600,DB03661,DB04302,DB04519, |
| 2.3.1.41  | R_3OAS141     | yes | yes | yes | b2323                                                                      | DB02039,DB02316,DB03264,DB03600,DB03661,DB04302,DB04519, |
| 2.3.1.41  | R_3OAS161     | yes | yes | yes | b2323                                                                      | DB02039,DB02316,DB03264,DB03600,DB03661,DB04302,DB04519, |
| 2.3.1.41  | R_3OAS181     | no  | no  | no  | b1095                                                                      | DB02039,DB02316,DB03264,DB03600,DB03661,DB04302,DB04519, |
|           | R_3PEPTabcpp  | no  | no  | no  | ( b1329 and b1244 and b1245 and b1246 and b1247 )                          | -                                                        |
| 1.4.3.6   | R_42A12BOOXpp | no  | no  | no  | b1386                                                                      | DB01634,DB01657,DB02511,DB02537,DB02928,DB03631,DB04334, |
|           | R_4HTHRS      | no  | no  | no  | b0004                                                                      | -                                                        |
|           | R_4PCP        | no  | no  | no  | b1192                                                                      | -                                                        |
|           | R_4PEPTabcpp  | no  | no  | no  | ( b1243 and b1244 and b1245 and b1246 and b1247 )                          | -                                                        |
| 1.1.1.69  | R_5DGLCNR     | no  | no  | no  | b4266                                                                      | -                                                        |
|           | R_5DGLCNt2rpp | no  | no  | no  | b4265                                                                      | -                                                        |
|           | R_5DOAN       | no  | no  | no  | b0159                                                                      | -                                                        |
|           | R_AADDGT      | no  | no  | no  | b4481                                                                      | -                                                        |
|           | R_AAMYL       | no  | no  | no  | b1927                                                                      | -                                                        |
|           | R_AAMYLpp     | no  | no  | no  | b3571                                                                      | -                                                        |
| 3.2.1.86  | R_AB6PGH      | no  | no  | no  | b2901                                                                      | -                                                        |
| 1.2.1.19  | R_ABUTD       | no  | no  | no  | b1444                                                                      | -                                                        |
|           | R_ABUTt2pp    | no  | no  | no  | b2663                                                                      | -                                                        |
|           | R_ACACCT      | no  | no  | no  | ( b2221 and b2222 )                                                        | -                                                        |
| 2.3.1.9   | R_ACACT1r     | no  | no  | no  | b2224                                                                      | DB01915,DB02039,DB02160,DB03045,                         |
|           | R_ACACT2pp    | no  | no  | no  | b2223                                                                      | -                                                        |
|           | R_ACALDtp     | no  | no  | no  | s0001                                                                      | -                                                        |
| 2.3.1.118 | R_ACANTHAT    | no  | no  | no  | b1463                                                                      | -                                                        |
|           | R_ACBIPGT     | no  | no  | no  | b1993                                                                      | -                                                        |
| 6.4.1.2   | R_ACCOAC      | yes | yes | no  | ( b0185 and b2316 and b3255 and b3256 )                                    | DB03781,                                                 |
| 6.2.1.13  | R_ACCOAL      | no  | no  | no  | b0335                                                                      | -                                                        |
| 2.7.1.59  | R_ACGAMK      | no  | no  | no  | b1119                                                                      | -                                                        |
|           | R_ACGAMT      | no  | no  | no  | b3784                                                                      | -                                                        |
|           | R_ACGAptpp    | no  | no  | no  | (( b2417 and b1101 and b2415 and b2416 ) or ( b0679 and b2415 and b2416 )) | -                                                        |
| 2.7.2.8   | R_ACGK        | no  | yes | no  | b3959                                                                      | DB04184,DB04444,                                         |
| 2.3.1.1   | R_ACGS        | no  | yes | yes | b2818                                                                      | -                                                        |
|           | R_ACMAMUT     | no  | no  | no  | b3794                                                                      | -                                                        |

|          |                |     |     |     |                                                   |                                                                                          |
|----------|----------------|-----|-----|-----|---------------------------------------------------|------------------------------------------------------------------------------------------|
|          | R_ACMANApptspp | no  | no  | no  | ( b1817 and b1818 and b1819 and b2415 and b2416 ) | -                                                                                        |
|          | R_ACMUMpptspp  | no  | no  | no  | ( b2417 and b2429 and b2415 and b2416 )           | -                                                                                        |
|          | R_ACNAMt2pp    | no  | no  | no  | b3224                                             | -                                                                                        |
| 4.1.3.3  | R_ACNML        | no  | no  | no  | b3225                                             | -                                                                                        |
| 1.3.99.2 | R_ACOAD1f      | no  | no  | no  | b0221                                             | -                                                                                        |
| 1.3.99.3 | R_ACOAD2f      | no  | no  | no  | b0221                                             | DB03415,                                                                                 |
| 1.3.99.3 | R_ACOAD3f      | no  | no  | no  | b0221                                             | DB03415,                                                                                 |
| 1.3.99.3 | R_ACOAD4f      | no  | no  | no  | b0221                                             | DB03415,                                                                                 |
| 1.3.99.3 | R_ACOAD5f      | no  | no  | no  | b0221                                             | DB03415,                                                                                 |
| 1.3.99.3 | R_ACOAD6f      | no  | no  | no  | b0221                                             | DB03415,                                                                                 |
| 1.3.99.3 | R_ACOAD7f      | no  | no  | no  | b0221                                             | DB03415,                                                                                 |
| 1.3.99.3 | R_ACOAD8f      | no  | no  | no  | b0221                                             | DB03415,                                                                                 |
| 3.5.1.16 | R_ACODA        | no  | yes | yes | b3957                                             | -                                                                                        |
| 5.3.3.7  | R_ACONIs       | no  | no  | no  | s0001                                             | -                                                                                        |
|          | R_ACONMT       | no  | no  | no  | b1519                                             | -                                                                                        |
| 6.2.1.1  | R_ACS          | no  | no  | no  | b4069                                             | -                                                                                        |
|          | R_Act4pp       | no  | no  | no  | b4067                                             | -                                                                                        |
| 3.5.4.4  | R_ADA          | no  | no  | no  | b1623                                             | DB02096,DB02472,DB02616,DB02830,DB03015,DB03220,DB03370,DB03572,DB04218,                 |
|          | R_ADCL         | no  | yes | no  | b1096                                             | -                                                                                        |
|          | R_ADCS         | no  | yes | no  | ( b3360 and b1812 )                               | -                                                                                        |
| 3.5.4.2  | R_ADD          | no  | no  | no  | b3665                                             | -                                                                                        |
|          | R_ADEt2rpp     | no  | no  | no  | b3654                                             | -                                                                                        |
| 2.7.4.3  | R_ADK1         | yes | no  | no  | b0474                                             | -                                                                                        |
|          | R_ADK3         | yes | no  | no  | b0474                                             | -                                                                                        |
|          | R_ADK4         | yes | no  | no  | b0474                                             | -                                                                                        |
| 4.1.1.50 | R_ADMDC        | no  | no  | no  | b0120                                             | DB03754,                                                                                 |
| 4.6.1.1  | R_ADNCYC       | no  | no  | no  | b3806                                             | DB02355,DB02587,DB02596,DB04447,                                                         |
| 2.7.1.20 | R_ADNK1        | yes | no  | no  | b0474                                             | DB02416,                                                                                 |
|          | R_ADNt2rpp     | no  | no  | no  | b2406                                             | -                                                                                        |
|          | R_ADNtex       | no  | no  | no  | b0411                                             | -                                                                                        |
| 3.2.2.8  | R_ADNUC        | no  | no  | no  | b0030                                             | -                                                                                        |
|          | R_ADOCBIK      | no  | no  | no  | b1993                                             | -                                                                                        |
|          | R_ADOCBLabcpp  | no  | no  | no  | ( b1711 and b1709 and b0158 )                     | -                                                                                        |
|          | R_ADOCBLS      | no  | no  | no  | b1992                                             | -                                                                                        |
|          | R_ADOCBLtonex  | no  | no  | no  | ( b3966 and ( b1252 and b3005 and b3006 ) )       | -                                                                                        |
| 3.6.1.13 | R_ADPRDP       | no  | no  | no  | b3397                                             | DB01975,DB02059,DB04352,                                                                 |
| 2.4.2.7  | R_ADPT         | no  | no  | no  | b0469                                             | -                                                                                        |
| 2.7.1.25 | R_ADSK         | no  | yes | no  | b2750                                             | DB02661,DB04077,                                                                         |
| 4.3.2.2  | R_ADSSL1r      | yes | yes | yes | b1131                                             | -                                                                                        |
| 4.3.2.2  | R_ADSSL2r      | yes | yes | yes | b1131                                             | -                                                                                        |
| 6.3.4.4  | R_ADSS         | no  | yes | yes | b4177                                             | DB02109,DB02150,DB02493,DB02666,DB02682,DB02836,DB02954,DB03146,DB03510,DB04184,DB04460, |
| 3.5.1.25 | R_AGDC         | no  | no  | no  | b0677                                             | -                                                                                        |
|          | R_AGM3PA       | no  | no  | no  | b0110                                             | -                                                                                        |
|          | R_AGM3PH       | no  | no  | no  | b1107                                             | -                                                                                        |
|          | R_AGM3Pt2pp    | no  | no  | no  | b0433                                             | -                                                                                        |
|          | R_AGM4PA       | no  | no  | no  | b0110                                             | -                                                                                        |
|          | R_AGM4PCP      | no  | no  | no  | b1192                                             | -                                                                                        |
|          | R_AGM4PH       | no  | no  | no  | b1107                                             | -                                                                                        |
|          | R_AGM4Pt2pp    | no  | no  | no  | b0433                                             | -                                                                                        |

|           |              |     |     |     |                                                         |                                                                                                                                                                                                                  |
|-----------|--------------|-----|-----|-----|---------------------------------------------------------|------------------------------------------------------------------------------------------------------------------------------------------------------------------------------------------------------------------|
|           | R_AGMH       | no  | no  | no  | b1107                                                   | -                                                                                                                                                                                                                |
| 5.1.3.20  | R_AGMHE      | no  | no  | no  | b3619                                                   | DB01774,DB03398,DB03461,                                                                                                                                                                                         |
| 3.5.3.11  | R_AGMT       | no  | no  | no  | b2937                                                   | -                                                                                                                                                                                                                |
|           | R_AGMt2pp    | no  | no  | no  | b0433                                                   | -                                                                                                                                                                                                                |
| 2.3.1.51  | R_AGPAT120   | yes | no  | yes | b3018                                                   | -                                                                                                                                                                                                                |
| 2.3.1.51  | R_AGPAT140   | yes | no  | yes | b3018                                                   | -                                                                                                                                                                                                                |
| 2.3.1.51  | R_AGPAT141   | yes | no  | yes | b3018                                                   | -                                                                                                                                                                                                                |
| 2.3.1.51  | R_AGPAT160   | yes | yes | yes | b3018                                                   | -                                                                                                                                                                                                                |
| 2.3.1.51  | R_AGPAT161   | yes | yes | yes | b3018                                                   | -                                                                                                                                                                                                                |
| 2.3.1.51  | R_AGPAT180   | yes | no  | yes | b3018                                                   | -                                                                                                                                                                                                                |
| 2.3.1.51  | R_AGPAT181   | yes | no  | yes | b3018                                                   | -                                                                                                                                                                                                                |
| 1.2.1.38  | R_AGPR       | no  | yes | yes | b3958                                                   | -                                                                                                                                                                                                                |
|           | R_AGt3       | no  | no  | no  | ( b0572 and b0573<br>and b0574 and<br>b0575 )           | -                                                                                                                                                                                                                |
| 3.2.2.9   | R_AHCYSNS    | no  | yes | no  | b0159                                                   | DB02158,DB02281,DB02933,                                                                                                                                                                                         |
| 2.1.2.3   | R_AICART     | no  | yes | yes | b4006                                                   | DB03442,DB04057,                                                                                                                                                                                                 |
|           | R_AIRC2      | no  | yes | no  | b0522                                                   | -                                                                                                                                                                                                                |
|           | R_AIRC3      | no  | yes | yes | b0523                                                   | -                                                                                                                                                                                                                |
|           | R_AKGDH      | no  | no  | no  | ( b0116 and b0726<br>and b0727 )                        | -                                                                                                                                                                                                                |
|           | R_AKGT2rpp   | no  | no  | no  | b2587                                                   | -                                                                                                                                                                                                                |
|           | R_ALAabcpp   | no  | no  | no  | ( b3454 and b3455<br>and b3457 and<br>b3460 and b3456 ) | -                                                                                                                                                                                                                |
| 3.4.17.14 | R_ALAALAD    | no  | no  | no  | b1488                                                   | -                                                                                                                                                                                                                |
|           | R_ALAGLUE    | no  | no  | no  | b1325                                                   | -                                                                                                                                                                                                                |
|           | R_ALAt2pp    | no  | no  | no  | b4208                                                   | -                                                                                                                                                                                                                |
|           | R_ALAt4pp    | no  | no  | no  | b0007                                                   | -                                                                                                                                                                                                                |
| 6.1.1.7   | R_ALATRS     | no  | no  | yes | b2697                                                   | -                                                                                                                                                                                                                |
| 1.1.1.1   | R_ALCD19     | no  | no  | no  | b0356                                                   | DB01711,DB02131,DB02249,DB02<br>721,DB02732,DB02822,DB02871,D<br>B03020,DB03061,DB03168,DB0322<br>6,DB03527,DB03704,DB04065,DB0<br>4071,DB04105,DB04113,DB04184,<br>DB04312,DB04399,DB04421,DB04<br>447,DB04448, |
| 1.2.1.39  | R_ALDD19x    | no  | no  | no  | b1385                                                   | -                                                                                                                                                                                                                |
| 1.2.1.3   | R_ALDD2x     | no  | no  | no  | b1300                                                   | DB04447,                                                                                                                                                                                                         |
| 1.2.1.4   | R_ALDD2y     | no  | no  | no  | b3588                                                   | DB03461,                                                                                                                                                                                                         |
|           | R_ALDD3y     | no  | no  | no  | b3588                                                   | -                                                                                                                                                                                                                |
|           | R_ALLabcpp   | no  | no  | no  | ( b4087 and b4088<br>and b4086 )                        | -                                                                                                                                                                                                                |
|           | R_ALLK       | yes | no  | no  | b4084                                                   | -                                                                                                                                                                                                                |
|           | R_ALLPI      | no  | no  | no  | b4090                                                   | -                                                                                                                                                                                                                |
| 3.5.3.9   | R_ALLTAMH    | no  | no  | no  | b0516                                                   | -                                                                                                                                                                                                                |
| 3.5.2.5   | R_ALLTN      | no  | no  | no  | b0512                                                   | -                                                                                                                                                                                                                |
|           | R_ALLTNt2rpp | no  | no  | no  | b0511                                                   | -                                                                                                                                                                                                                |
|           | R_ALLLULPE   | no  | no  | no  | b4085                                                   | -                                                                                                                                                                                                                |
|           | R_ALR4x      | no  | no  | no  | b3945                                                   | -                                                                                                                                                                                                                |
| 4.2.1.7   | R_ALTRH      | no  | no  | no  | b3091                                                   | -                                                                                                                                                                                                                |
|           | R_AM3PA      | no  | no  | no  | b0110                                                   | -                                                                                                                                                                                                                |
|           | R_AM4PA      | no  | no  | no  | b0110                                                   | -                                                                                                                                                                                                                |
|           | R_AM4PCP     | no  | no  | no  | b1192                                                   | -                                                                                                                                                                                                                |
| 2.4.1.25  | R_AMALT1     | no  | no  | no  | b3416                                                   | DB04439,                                                                                                                                                                                                         |
| 2.4.1.25  | R_AMALT2     | no  | no  | no  | b3416                                                   | DB04439,                                                                                                                                                                                                         |
| 2.4.1.25  | R_AMALT3     | no  | no  | no  | b3416                                                   | DB04439,                                                                                                                                                                                                         |
| 2.4.1.25  | R_AMALT4     | no  | no  | no  | b3416                                                   | DB04439,                                                                                                                                                                                                         |
|           | R_AMANAPeR   | no  | no  | no  | b3223                                                   | -                                                                                                                                                                                                                |
| 2.7.1.60  | R_AMANK      | no  | no  | no  | b3222                                                   | -                                                                                                                                                                                                                |
| 2.6.1.62  | R_AMAOTr     | no  | no  | no  | b0774                                                   | DB02274,DB02725,DB04083,DB04<br>402,                                                                                                                                                                             |
|           | R_AMMQLT8    | no  | no  | no  | b3833                                                   | -                                                                                                                                                                                                                |

|           |              |     |     |     |                                                         |                                                                                                      |
|-----------|--------------|-----|-----|-----|---------------------------------------------------------|------------------------------------------------------------------------------------------------------|
|           | R_AMPMS2     | no  | yes | no  | b3994                                                   | -                                                                                                    |
| 3.2.2.4   | R_AMPN       | no  | no  | no  | b1982                                                   | DB03464,                                                                                             |
|           | R_ANHMK      | no  | no  | no  | b1640                                                   | -                                                                                                    |
| 2.4.2.18  | R_ANPRT      | no  | yes | no  | b1263                                                   | DB02212,DB04184,                                                                                     |
| 4.1.3.27  | R_ANS        | no  | yes | no  | ( b1263 and b1264 )                                     | -                                                                                                    |
|           | R_AOBUTDs    | no  | no  | no  | s0001                                                   | -                                                                                                    |
| 2.3.1.47  | R_AOXSr      | no  | no  | no  | b0776                                                   | DB03160,                                                                                             |
| 3.6.1.41  | R_AP4AH      | no  | no  | no  | b0049                                                   | -                                                                                                    |
|           | R_AP5AH      | no  | no  | no  | b0049                                                   | -                                                                                                    |
| 1.1.1.193 | R_APRAUR     | yes | yes | no  | b0414                                                   | -                                                                                                    |
| 5.3.1.4   | R_ARAI       | no  | no  | no  | b0062                                                   | -                                                                                                    |
|           | R_ARBabcpp   | no  | no  | no  | ( b1901 and b1900<br>and b4460 )                        | -                                                                                                    |
|           | R_ARBt2rpp   | no  | no  | no  | b2841                                                   | -                                                                                                    |
|           | R_ARBt3ipp   | no  | no  | no  | b1528                                                   | -                                                                                                    |
|           | R_ARBTNabcpp | no  | no  | no  | ( b0153 and b0151<br>and b0152 )                        | -                                                                                                    |
|           | R_ARBTNexs   | no  | no  | no  | s0001                                                   | -                                                                                                    |
|           | R_ARGAGMt7pp | no  | no  | no  | b4115                                                   | -                                                                                                    |
| 4.1.1.19  | R_ARGDC      | no  | no  | no  | b4117                                                   | -                                                                                                    |
| 4.1.1.19  | R_ARGDCpp    | no  | no  | no  | b2938                                                   | -                                                                                                    |
|           | R_ARGORNt7pp | no  | no  | no  | b1605                                                   | -                                                                                                    |
| 4.3.2.1   | R_ARGSL      | no  | yes | no  | b3960                                                   | -                                                                                                    |
| 6.3.4.5   | R_ARGSS      | no  | yes | yes | b3172                                                   | DB04077,                                                                                             |
|           | R_ARGt3pp    | no  | no  | no  | b2923                                                   | -                                                                                                    |
| 6.1.1.19  | R_ARGTRS     | yes | no  | yes | b1876                                                   | -                                                                                                    |
| 1.2.1.11  | R_ASAD       | yes | yes | no  | b3433                                                   | DB03461,DB03502,DB04399,                                                                             |
|           | R_ASCBPL     | no  | no  | no  | b4192                                                   | -                                                                                                    |
|           | R_ASCBptspp  | no  | no  | no  | ( b2415 and b2416<br>and b4195 and<br>b4194 and b4193 ) | -                                                                                                    |
| 3.5.1.1   | R_ASNNpp     | no  | no  | no  | b2957                                                   | DB01817,DB02233,DB03412,                                                                             |
| 6.3.5.4   | R_ASNS1      | no  | no  | no  | b0674                                                   | -                                                                                                    |
| 6.3.1.1   | R_ASNS2      | no  | no  | no  | b3744                                                   | -                                                                                                    |
|           | R_ASNt2rpp   | no  | no  | no  | b1453                                                   | -                                                                                                    |
| 6.1.1.22  | R_ASNTRS     | yes | no  | yes | b0930                                                   | -                                                                                                    |
|           | R_ASO3t8pp   | no  | no  | no  | b3502                                                   | -                                                                                                    |
| 4.1.1.11  | R_ASP1DC     | no  | yes | yes | b0131                                                   | DB03382,                                                                                             |
|           | R_ASPabcpp   | no  | no  | no  | ( b0655 and b0654<br>and b0653 and<br>b0652 )           | -                                                                                                    |
| 2.1.3.2   | R_ASPCT      | no  | yes | no  | ( b4244 and b4245 )                                     | DB03459,                                                                                             |
|           | R_ASPO3      | no  | no  | no  | b2574                                                   | -                                                                                                    |
|           | R_ASPO4      | no  | no  | no  | b2574                                                   | -                                                                                                    |
|           | R_ASPO5      | no  | no  | no  | b2574                                                   | -                                                                                                    |
|           | R_ASPO6      | no  | no  | no  | b2574                                                   | -                                                                                                    |
| 4.3.1.1   | R_ASPT       | no  | no  | no  | b4139                                                   | DB04184,                                                                                             |
|           | R_ASPt2_2pp  | no  | no  | no  | b3528                                                   | -                                                                                                    |
|           | R_ASPt2pp    | no  | no  | no  | b4077                                                   | -                                                                                                    |
| 2.6.1.1   | R_ASPTA      | no  | yes | no  | b0928                                                   | DB01639,DB02142,DB02758,DB02<br>783,DB02926,DB03629,DB03750,D<br>B04083,DB04467,DB04762,DB0476<br>5, |
| 6.1.1.12  | R_ASPTRS     | yes | no  | yes | b1866                                                   | -                                                                                                    |
|           | R_ASR        | no  | no  | no  | ( b3503 and b1064 )                                     | -                                                                                                    |
| 2.3.1.109 | R_AST        | no  | no  | no  | b1747                                                   | -                                                                                                    |
|           | R_ATHRDHr    | no  | no  | no  | b1539                                                   | -                                                                                                    |
|           | R_ATPHs      | no  | no  | no  | s0001                                                   | -                                                                                                    |
| 2.4.2.17  | R_ATPPRT     | no  | yes | no  | b2019                                                   | -                                                                                                    |

|          |             |     |     |     |                                                                                                                                                                                                                                 |                          |
|----------|-------------|-----|-----|-----|---------------------------------------------------------------------------------------------------------------------------------------------------------------------------------------------------------------------------------|--------------------------|
| 3.6.3.14 | R_ATPS4rpp  | no  | no  | no  | (( (b3736 and b3737 DB01218,DB02043,DB02686,DB03 and b3738 ) and ( 091, b3731 and b3732 and b3733 and b3734 and b3735 ) ) or ( (b3736 and b3737 and b3738 ) and ( b3731 and b3732 and b3733 and b3734 and b3735 ) and b3739 ) ) | -                        |
|          | R_BALAt2pp  | no  | no  | no  | b4208                                                                                                                                                                                                                           | -                        |
| 1.2.1.8  | R_BETALDHx  | no  | no  | no  | b0312                                                                                                                                                                                                                           | -                        |
| 1.2.1.8  | R_BETALDHy  | no  | no  | no  | b0312                                                                                                                                                                                                                           | -                        |
|          | R_BSORx     | no  | no  | no  | b3551                                                                                                                                                                                                                           | -                        |
|          | R_BSORy     | no  | no  | no  | b3551                                                                                                                                                                                                                           | -                        |
| 2.8.1.6  | R_BTS4      | no  | no  | no  | b0775                                                                                                                                                                                                                           | DB03754,DB03775,         |
| 2.8.3.8  | R_BUTCT     | no  | no  | no  | ( b2221 and b2222 )                                                                                                                                                                                                             | -                        |
|          | R_BUTt2rpp  | no  | no  | no  | b2223                                                                                                                                                                                                                           | -                        |
|          | R_CA2t3pp   | no  | no  | no  | b1216                                                                                                                                                                                                                           | -                        |
|          | R_CADVtpp   | no  | no  | no  | b4132                                                                                                                                                                                                                           | -                        |
|          | R_CAt6pp    | no  | yes | yes | b3196                                                                                                                                                                                                                           | -                        |
| 2.5.1.17 | R_CBIAT     | no  | no  | no  | b1270                                                                                                                                                                                                                           | -                        |
|          | R_CBltonex  | no  | no  | no  | ( b3966 and ( b1252 and b3005 and b3006 ) )                                                                                                                                                                                     | -                        |
|          | R_CBluabcpp | no  | no  | no  | ( b1711 and b1709 and b0158 )                                                                                                                                                                                                   | -                        |
|          | R_CBL1abcpp | no  | no  | no  | ( b1711 and b1709 and b0158 )                                                                                                                                                                                                   | -                        |
|          | R_CBL1tonex | no  | no  | no  | ( b3966 and ( b1252 and b3005 and b3006 ) )                                                                                                                                                                                     | -                        |
| 2.5.1.17 | R_CBLAT     | no  | no  | no  | b1270                                                                                                                                                                                                                           | -                        |
| 6.3.5.5  | R_CBPS      | no  | no  | no  | ( b0032 and b0033 )                                                                                                                                                                                                             | -                        |
|          | R_CD2abcpp  | no  | no  | no  | b3469                                                                                                                                                                                                                           | -                        |
|          | R_CD2tpp    | no  | no  | no  | b3040                                                                                                                                                                                                                           | -                        |
| 3.6.1.26 | R_CDAPPA120 | no  | no  | no  | b3918                                                                                                                                                                                                                           | DB04568,                 |
| 3.6.1.26 | R_CDAPPA140 | no  | no  | no  | b3918                                                                                                                                                                                                                           | DB04568,                 |
| 3.6.1.26 | R_CDAPPA141 | no  | no  | no  | b3918                                                                                                                                                                                                                           | DB04568,                 |
| 3.6.1.26 | R_CDAPPA160 | no  | no  | no  | b3918                                                                                                                                                                                                                           | DB04568,                 |
| 3.6.1.26 | R_CDAPPA161 | no  | no  | no  | b3918                                                                                                                                                                                                                           | DB04568,                 |
| 3.6.1.26 | R_CDAPPA180 | no  | no  | no  | b3918                                                                                                                                                                                                                           | DB04568,                 |
| 3.6.1.26 | R_CDAPPA181 | no  | no  | no  | b3918                                                                                                                                                                                                                           | DB04568,                 |
|          | R_CDPMEK    | yes | yes | yes | b1208                                                                                                                                                                                                                           | -                        |
| 2.1.1.79 | R_CFAS160E  | no  | no  | no  | b1661                                                                                                                                                                                                                           | DB00339,DB01718,DB04221, |
| 2.1.1.79 | R_CFAS160G  | no  | no  | no  | b1661                                                                                                                                                                                                                           | DB00339,DB01718,DB04221, |
| 2.1.1.79 | R_CFAS180E  | no  | no  | no  | b1661                                                                                                                                                                                                                           | DB00339,DB01718,DB04221, |
| 2.1.1.79 | R_CFAS180G  | no  | no  | no  | b1661                                                                                                                                                                                                                           | DB00339,DB01718,DB04221, |
|          | R_CGLYabcpp | no  | no  | no  | ( b3544 and b3543 and b3542 and b3541 and b3540 )                                                                                                                                                                               | -                        |
|          | R_CHLabcpp  | no  | no  | no  | ( b2128 and b2129 and b2130 and b2131 )                                                                                                                                                                                         | -                        |
| 4.2.3.5  | R_CHORS     | no  | yes | yes | b2329                                                                                                                                                                                                                           | DB03350,                 |
|          | R_CHRPL     | no  | yes | no  | b4039                                                                                                                                                                                                                           | -                        |
|          | R_CINNDO    | no  | no  | no  | ( b2538 and b2539 and b2540 and b2542 )                                                                                                                                                                                         | -                        |

|          |                |     |     |     |                                                     |                                      |
|----------|----------------|-----|-----|-----|-----------------------------------------------------|--------------------------------------|
| 4.1.3.6  | R_CITL         | no  | no  | no  | (( b0615 and b0616 -<br>and b0617 ) and<br>b0614 )  | -                                    |
|          | R_CITt7pp      | no  | no  | no  | b0612                                               | -                                    |
|          | R_CO2tpp       | no  | no  | yes | s0001                                               | -                                    |
|          | R_COBALT2abcpp | no  | no  | no  | b3469                                               | -                                    |
|          | R_COLIPAabcpp  | yes | no  | yes | b0914                                               | -                                    |
|          | R_CPGNabcpp    | no  | no  | no  | ( b0153 and b0151<br>and b0152 )                    | -                                    |
|          | R_CPGNexs      | no  | no  | no  | s0001                                               | -                                    |
|          | R_CPGNtonex    | no  | no  | no  | ( b1102 and ( b1252 -<br>and b3005 and<br>b3006 ) ) | -                                    |
| 1.3.3.3  | R_CPPPGO       | no  | no  | no  | b2436                                               | -                                    |
|          | R_CPPPGO2      | no  | no  | no  | b3867                                               | -                                    |
|          | R_CRNabcpp     | no  | no  | no  | ( b2677 and b2678<br>and b2679 )                    | -                                    |
|          | R_CRNBCT       | no  | no  | no  | b0038                                               | -                                    |
|          | R_CRNCAL2      | no  | no  | no  | b0037                                               | -                                    |
|          | R_CRNCAR       | no  | no  | no  | b0036                                               | -                                    |
|          | R_CRNCBCT      | no  | no  | no  | b0038                                               | -                                    |
|          | R_CRNCDH       | no  | no  | no  | b0036                                               | -                                    |
|          | R_CRNDabcpp    | no  | no  | no  | ( b2677 and b2678<br>and b2679 )                    | -                                    |
|          | R_CRNDCAL2     | no  | no  | no  | b0037                                               | -                                    |
|          | R_CRNDt2rpp    | no  | no  | no  | b4111                                               | -                                    |
|          | R_CRNt2rpp     | no  | no  | no  | b4111                                               | -                                    |
|          | R_CRNt7pp      | no  | no  | no  | b0040                                               | -                                    |
|          | R_CRNt8pp      | no  | no  | no  | b0040                                               | -                                    |
|          | R_CS           | no  | yes | no  | b0720                                               | -                                    |
| 3.5.4.1  | R_CSND         | no  | no  | no  | b0337                                               | DB03939,DB04135,                     |
|          | R_CSNT2pp      | no  | no  | no  | b0336                                               | -                                    |
|          | R_CTBTabcpp    | no  | no  | no  | ( b2677 and b2678<br>and b2679 )                    | -                                    |
|          | R_CTBTCAL2     | no  | no  | no  | b0037                                               | -                                    |
|          | R_CTBTt2rpp    | no  | no  | no  | b4111                                               | -                                    |
| 6.3.4.2  | R_CTPS2        | yes | yes | no  | b2780                                               | -                                    |
|          | R_CU1abcpp     | no  | no  | no  | b0484                                               | -                                    |
|          | R_CU1Opp       | no  | no  | no  | b0123                                               | -                                    |
|          | R_CU2abcpp     | no  | no  | no  | b3469                                               | -                                    |
|          | R_CU2tpp       | no  | yes | no  | b3040                                               | -                                    |
|          | R_CUt3         | no  | no  | no  | ( b0572 and b0573<br>and b0574 and<br>b0575 )       | -                                    |
| 2.8.1.1  | R_CYANST       | no  | no  | no  | b3425                                               | DB04053,DB04184,                     |
| 2.8.1.1  | R_CYANSTpp     | no  | no  | no  | b1308                                               | DB04053,DB04184,                     |
|          | R_CYNTAH       | no  | no  | no  | b0340                                               | -                                    |
|          | R_CYNTt2pp     | no  | no  | no  | b0341                                               | -                                    |
| 4.4.1.15 | R_CYSDDS       | no  | no  | no  | b1919                                               | -                                    |
| 4.1.1.12 | R_CYSSADS      | no  | no  | no  | b2810                                               | -                                    |
| 6.1.1.16 | R_CYSTRS       | yes | no  | yes | b0526                                               | -                                    |
|          | R_CYTBD2pp     | no  | no  | no  | ( b0978 and b0979 )                                 | -                                    |
|          | R_CYTBO3_4pp   | no  | no  | no  | ( b0429 and b0430<br>and b0431 and<br>b0432 )       | -                                    |
| 3.5.4.5  | R_CYTD         | no  | no  | no  | b2143                                               | DB03068,DB03185,DB03562,DB04<br>385, |
|          | R_CYTDK2       | no  | no  | no  | b2066                                               | -                                    |
|          | R_CYTDt2rpp    | no  | no  | no  | b2406                                               | -                                    |
| 2.7.4.14 | R_CYTK1        | no  | no  | no  | b0910                                               | DB02456,DB02883,DB03664,DB04<br>444, |

|           |               |     |     |     |                                                   |                                                                                                          |
|-----------|---------------|-----|-----|-----|---------------------------------------------------|----------------------------------------------------------------------------------------------------------|
| 2.7.4.14  | R_CYTK2       | no  | no  | yes | b0910                                             | DB02456,DB02883,DB03664,DB0444,                                                                          |
| 1.4.99.1  | R_DAAD        | no  | no  | no  | b1189                                             | -                                                                                                        |
|           | R_DADA        | no  | no  | no  | b1623                                             | -                                                                                                        |
| 2.7.4.11  | R_DADK        | yes | no  | no  | b0474                                             | -                                                                                                        |
|           | R_DADNtex     | no  | no  | no  | b0411                                             | -                                                                                                        |
| 2.7.1.107 | R_DAGK120     | no  | no  | no  | b4042                                             | -                                                                                                        |
| 2.7.1.107 | R_DAGK140     | no  | no  | no  | b4042                                             | -                                                                                                        |
| 2.7.1.107 | R_DAGK141     | no  | no  | no  | b4042                                             | -                                                                                                        |
| 2.7.1.107 | R_DAGK160     | no  | no  | no  | b4042                                             | -                                                                                                        |
| 2.7.1.107 | R_DAGK161     | no  | no  | no  | b4042                                             | -                                                                                                        |
| 2.7.1.107 | R_DAGK180     | no  | no  | no  | b4042                                             | -                                                                                                        |
| 2.7.1.107 | R_DAGK181     | no  | no  | no  | b4042                                             | -                                                                                                        |
|           | R_DALAt2pp    | no  | no  | no  | b4208                                             | -                                                                                                        |
| 4.3.1.15  | R_DAPAL       | no  | no  | no  | b2871                                             | -                                                                                                        |
| 4.1.1.20  | R_DAPDC       | no  | yes | yes | b2838                                             | DB00548,DB03814,DB04083,                                                                                 |
| 5.1.1.7   | R_DAPE        | no  | yes | no  | b3809                                             | -                                                                                                        |
| 2.7.7.41  | R_DASYN120    | yes | no  | yes | b0175                                             | -                                                                                                        |
| 2.7.7.41  | R_DASYN140    | yes | no  | yes | b0175                                             | -                                                                                                        |
| 2.7.7.41  | R_DASYN141    | yes | no  | yes | b0175                                             | -                                                                                                        |
| 2.7.7.41  | R_DASYN160    | yes | yes | yes | b0175                                             | -                                                                                                        |
| 2.7.7.41  | R_DASYN161    | yes | yes | yes | b0175                                             | -                                                                                                        |
| 2.7.7.41  | R_DASYN180    | yes | no  | yes | b0175                                             | -                                                                                                        |
| 2.7.7.41  | R_DASYN181    | yes | no  | yes | b0175                                             | -                                                                                                        |
|           | R_DATPHs      | no  | no  | no  | s0001                                             | -                                                                                                        |
|           | R_DB4PS       | yes | yes | yes | b3041                                             | -                                                                                                        |
| 6.3.3.3   | R_DBTS        | no  | no  | no  | b0778                                             | DB01715,DB02927,DB02941,DB03624,DB03775,                                                                 |
| 3.5.4.13  | R_DCTPD       | no  | no  | no  | b2065                                             | -                                                                                                        |
| 3.5.4.14  | R_DCYTD       | no  | no  | no  | b2143                                             | -                                                                                                        |
|           | R_DCYTtex     | no  | no  | no  | b0411                                             | -                                                                                                        |
|           | R_DDCAtexi    | no  | no  | no  | b2344                                             | -                                                                                                        |
| 2.7.1.58  | R_DDGLK       | no  | no  | no  | b3693                                             | -                                                                                                        |
|           | R_DDGLCNT2rpp | no  | no  | no  | b3909                                             | -                                                                                                        |
| 2.7.1.45  | R_DDGLK       | no  | no  | no  | b3526                                             | -                                                                                                        |
| 4.1.2.21  | R_DDPGALA     | no  | no  | no  | b4477                                             | -                                                                                                        |
| 2.7.4.8   | R_DGK1        | yes | no  | no  | b3648                                             | -                                                                                                        |
|           | R_DGSNt2pp    | no  | no  | no  | b2964                                             | -                                                                                                        |
| 4.2.1.9   | R_DHAD1       | no  | yes | no  | b3771                                             | -                                                                                                        |
|           | R_DHAD2       | no  | yes | no  | b3771                                             | -                                                                                                        |
|           | R_DHAPT       | no  | no  | no  | ( b1200 and b1199 and b1198 and b2415 and b2416 ) | -                                                                                                        |
| 1.3.1.28  | R_DHBD        | no  | no  | no  | b0596                                             | -                                                                                                        |
| 2.7.7.58  | R_DHBS        | no  | no  | no  | b0594                                             | -                                                                                                        |
|           | R_DHCIND      | no  | no  | no  | b2541                                             | -                                                                                                        |
|           | R_DHCINDO     | no  | no  | no  | b0348                                             | -                                                                                                        |
| 1.3.1.26  | R_DHDPRy      | yes | yes | yes | b0031                                             | DB02575,DB03969,DB04184,                                                                                 |
| 4.2.1.52  | R_DHDPS       | yes | yes | yes | b2478                                             | -                                                                                                        |
| 6.3.2.12  | R_DHFS        | yes | yes | no  | b2315                                             | -                                                                                                        |
|           | R_DHNAOT4     | no  | no  | no  | b3930                                             | -                                                                                                        |
|           | R_DHNPAA2     | no  | yes | no  | b3058                                             | -                                                                                                        |
| 1.3.3.1   | R_DHORD2      | no  | no  | no  | b0945                                             | DB00263,DB00359,DB00664,DB01117,DB01145,DB02613,DB03122,DB03480,DB03523,DB03805,DB04184,DB04281,DB04583, |
| 1.3.3.1   | R_DHORD5      | no  | no  | no  | b0945                                             | DB00263,DB00359,DB00664,DB01117,DB01145,DB02613,DB03122,DB03480,DB03523,DB03805,DB04184,DB04281,DB04583, |
| 3.5.2.3   | R_DHORTS      | no  | yes | yes | b1062                                             | -                                                                                                        |
|           | R_DHPPD       | no  | no  | no  | b2541                                             | -                                                                                                        |
| 3.5.4.26  | R_DHPPDA2     | yes | yes | yes | b0414                                             | -                                                                                                        |



|          |             |     |     |     |                                              |                                                                                  |
|----------|-------------|-----|-----|-----|----------------------------------------------|----------------------------------------------------------------------------------|
| 2.5.1.15 | R_DHPS2     | no  | yes | yes | b3177                                        | DB00250,DB00263,DB00576,DB00664,DB01298,DB03592,DB03705,DB04047,DB04196,         |
|          | R_DHPTDCs   | no  | yes | no  | s0001                                        | -                                                                                |
|          | R_DHPTPE    | no  | no  | no  | b2303                                        | -                                                                                |
|          | R_DHQS      | no  | yes | no  | b3389                                        | -                                                                                |
| 4.2.1.10 | R_DHQTi     | no  | yes | yes | b1693                                        | DB02592,DB02786,DB02801,DB03739,DB03746,DB03868,DB04656,DB04698,                 |
|          | R_DINSt2pp  | no  | no  | no  | b2964                                        | -                                                                                |
|          | R_DKGLCNR2x | no  | no  | no  | b3553                                        | -                                                                                |
|          | R_DKGLCNR2y | no  | no  | no  | b3553                                        | -                                                                                |
| 2.5.1.1  | R_DMATT     | yes | yes | no  | b0421                                        | -                                                                                |
|          | R_DMPPS     | yes | no  | yes | b0029                                        | -                                                                                |
|          | R_DMQMT     | no  | no  | no  | b2232                                        | -                                                                                |
|          | R_DMSOR1pp  | no  | no  | no  | ( b1872 and b1873 )                          | -                                                                                |
|          | R_DMSOR2    | no  | no  | no  | ( b0894 and b0895 and b0896 )                | -                                                                                |
|          | R_DMSOR2pp  | no  | no  | no  | ( b1872 and b1873 )                          | -                                                                                |
|          | R_DOGULNR   | no  | no  | no  | b3575                                        | -                                                                                |
| 2.7.1.24 | R_DPCOAK    | no  | yes | no  | b0103                                        | DB04184,                                                                         |
| 4.1.2.4  | R_DRPA      | no  | no  | no  | b4381                                        | DB04087,                                                                         |
|          | R_DSBAO1    | no  | no  | no  | ( b3860 and b1185 )                          | -                                                                                |
|          | R_DSBAO2    | no  | no  | no  | ( b3860 and b1185 )                          | -                                                                                |
|          | R_DSBCGT    | no  | no  | no  | b2893                                        | -                                                                                |
|          | R_DSBDR     | no  | no  | no  | (( b4136 and b3781 ) or ( b4136 and b2582 )) | -                                                                                |
|          | R_DSBBGT    | no  | no  | no  | b0604                                        | -                                                                                |
|          | R_DSERDHR   | no  | no  | no  | b1539                                        | -                                                                                |
|          | R_DSERT2pp  | no  | no  | no  | b4208                                        | -                                                                                |
| 2.7.4.9  | R_DTMPK     | yes | yes | yes | b1098                                        | DB02452,DB03150,DB03195,DB03233,DB03280,DB03666,DB03845,DB03846,DB04184,         |
|          | R_DURIK1    | no  | no  | no  | b1238                                        | -                                                                                |
|          | R_DURItex   | no  | no  | no  | b0411                                        | -                                                                                |
|          | R_DXPRli    | yes | yes | yes | b0173                                        | -                                                                                |
|          | R_DXPS      | yes | yes | yes | b0420                                        | -                                                                                |
|          | R_DXYLK     | no  | no  | no  | b3564                                        | -                                                                                |
|          | R_E4PD      | no  | yes | yes | b2927                                        | -                                                                                |
| 1.3.1.9  | R_EAR100x   | yes | no  | yes | b1288                                        | DB00609,DB00951,DB01691,DB01865,DB02990,DB03030,DB03534,DB04030,DB04289,DB04393, |
| 1.3.1.10 | R_EAR100y   | yes | no  | yes | b1288                                        | -                                                                                |
| 1.3.1.9  | R_EAR120x   | yes | no  | yes | b1288                                        | DB00609,DB00951,DB01691,DB01865,DB02990,DB03030,DB03534,DB04030,DB04289,DB04393, |
| 1.3.1.10 | R_EAR120y   | yes | no  | yes | b1288                                        | -                                                                                |
| 1.3.1.9  | R_EAR121x   | yes | no  | yes | b1288                                        | DB00609,DB00951,DB01691,DB01865,DB02990,DB03030,DB03534,DB04030,DB04289,DB04393, |
| 1.3.1.10 | R_EAR121y   | yes | no  | yes | b1288                                        | -                                                                                |
| 1.3.1.9  | R_EAR140x   | yes | no  | yes | b1288                                        | DB00609,DB00951,DB01691,DB01865,DB02990,DB03030,DB03534,DB04030,DB04289,DB04393, |

|          |               |     |    |     |                               |                                                                                  |
|----------|---------------|-----|----|-----|-------------------------------|----------------------------------------------------------------------------------|
| 1.3.1.10 | R_EAR140y     | yes | no | yes | b1288                         | -                                                                                |
| 1.3.1.9  | R_EAR141x     | yes | no | yes | b1288                         | DB00609,DB00951,DB01691,DB01865,DB02990,DB03030,DB03534,DB04030,DB04289,DB04393, |
| 1.3.1.10 | R_EAR141y     | yes | no | yes | b1288                         | -                                                                                |
| 1.3.1.9  | R_EAR160x     | yes | no | yes | b1288                         | DB00609,DB00951,DB01691,DB01865,DB02990,DB03030,DB03534,DB04030,DB04289,DB04393, |
| 1.3.1.10 | R_EAR160y     | yes | no | yes | b1288                         | -                                                                                |
| 1.3.1.9  | R_EAR161x     | yes | no | yes | b1288                         | DB00609,DB00951,DB01691,DB01865,DB02990,DB03030,DB03534,DB04030,DB04289,DB04393, |
| 1.3.1.10 | R_EAR161y     | yes | no | yes | b1288                         | -                                                                                |
| 1.3.1.9  | R_EAR180x     | yes | no | yes | b1288                         | DB00609,DB00951,DB01691,DB01865,DB02990,DB03030,DB03534,DB04030,DB04289,DB04393, |
| 1.3.1.10 | R_EAR180y     | yes | no | yes | b1288                         | -                                                                                |
| 1.3.1.9  | R_EAR181x     | yes | no | yes | b1288                         | DB00609,DB00951,DB01691,DB01865,DB02990,DB03030,DB03534,DB04030,DB04289,DB04393, |
| 1.3.1.10 | R_EAR181y     | yes | no | yes | b1288                         | -                                                                                |
| 1.3.1.9  | R_EAR40x      | yes | no | yes | b1288                         | DB00609,DB00951,DB01691,DB01865,DB02990,DB03030,DB03534,DB04030,DB04289,DB04393, |
| 1.3.1.10 | R_EAR40y      | yes | no | yes | b1288                         | -                                                                                |
| 1.3.1.9  | R_EAR60x      | yes | no | yes | b1288                         | DB00609,DB00951,DB01691,DB01865,DB02990,DB03030,DB03534,DB04030,DB04289,DB04393, |
| 1.3.1.10 | R_EAR60y      | yes | no | yes | b1288                         | -                                                                                |
| 1.3.1.9  | R_EAR80x      | yes | no | yes | b1288                         | DB00609,DB00951,DB01691,DB01865,DB02990,DB03030,DB03534,DB04030,DB04289,DB04393, |
| 1.3.1.10 | R_EAR80y      | yes | no | yes | b1288                         | -                                                                                |
|          | R_ECA4OALpp   | no  | no | no  | b3622                         | -                                                                                |
|          | R_ECAtp       | no  | no | no  | b3792                         | -                                                                                |
| 4.1.2.14 | R_EDA         | no  | no | no  | b1850                         | DB04184,                                                                         |
| 4.2.1.12 | R_EDD         | no  | no | no  | b1851                         | -                                                                                |
|          | R_EDTXS1      | no  | no | no  | b1054                         | -                                                                                |
|          | R_EDTXS2      | no  | no | no  | b1855                         | -                                                                                |
|          | R_EDTXS3      | no  | no | no  | b2378                         | -                                                                                |
|          | R_EDTXS4      | no  | no | no  | b1855                         | -                                                                                |
| 4.2.1.11 | R_ENO         | yes | no | no  | b2779                         | DB03645,DB04077,                                                                 |
|          | R_ENTCS       | yes | no | no  | b0583                         | -                                                                                |
|          | R_ENTERES     | no  | no | no  | b0585                         | -                                                                                |
|          | R_ENTERES2    | no  | no | no  | b0585                         | -                                                                                |
| 4.3.1.7  | R_ETHAAL      | no  | no | no  | ( b2440 and b2441 )           | -                                                                                |
|          | R_ETHSO3abcpp | no  | no | no  | ( b0936 and b0933 and b0934 ) | -                                                                                |
|          | R_F6PP        | no  | no | no  | b0822                         | -                                                                                |
|          | R_F6Pt6_2pp   | no  | no | no  | b3666                         | -                                                                                |
| 3.1.2.14 | R_FA100ACPHi  | no  | no | no  | b0404                         | -                                                                                |
| 3.1.2.14 | R_FA120ACPHi  | no  | no | no  | b0404                         | -                                                                                |
| 3.1.2.14 | R_FA140ACPHi  | no  | no | no  | b0404                         | -                                                                                |
| 3.1.2.14 | R_FA141ACPHi  | no  | no | no  | b0404                         | -                                                                                |

|          |                     |     |     |     |                                                                                                           |                  |
|----------|---------------------|-----|-----|-----|-----------------------------------------------------------------------------------------------------------|------------------|
| 3.1.2.14 | R_FA160ACPHi        | no  | no  | no  | b0404                                                                                                     | -                |
| 3.1.2.14 | R_FA161ACPHi        | no  | no  | no  | b0404                                                                                                     | -                |
| 3.1.2.14 | R_FA80ACPHi         | no  | no  | no  | b0404                                                                                                     | -                |
|          | R_FACOAE100         | no  | no  | no  | b0452                                                                                                     | -                |
|          | R_FACOAE120         | no  | no  | no  | b0452                                                                                                     | -                |
|          | R_FACOAE140         | no  | no  | no  | b0452                                                                                                     | -                |
|          | R_FACOAE141         | no  | no  | no  | b0452                                                                                                     | -                |
|          | R_FACOAE160         | no  | no  | no  | b0452                                                                                                     | -                |
|          | R_FACOAE161         | no  | no  | no  | b0452                                                                                                     | -                |
|          | R_FACOAE180         | no  | no  | no  | b0452                                                                                                     | -                |
|          | R_FACOAE181         | no  | no  | no  | b0452                                                                                                     | -                |
|          | R_FACOAE60          | no  | no  | no  | b0452                                                                                                     | -                |
|          | R_FACOAE80          | no  | no  | no  | b0452                                                                                                     | -                |
|          | R_FADRx             | no  | no  | no  | b3844                                                                                                     | -                |
|          | R_FADRx2            | no  | no  | no  | ( b2763 and b2764 )                                                                                       | -                |
|          | R_FALDH2            | no  | no  | no  | b0356                                                                                                     | -                |
|          | R_FALDtp            | no  | no  | no  | s0001                                                                                                     | -                |
|          | R_FALGTHLs          | no  | no  | no  | s0001                                                                                                     | -                |
| 5.3.1.25 | R_FCI               | no  | no  | no  | b2802                                                                                                     | DB03815,         |
| 2.7.1.51 | R_FCLK              | no  | no  | no  | b2803                                                                                                     | -                |
| 4.99.1.1 | R_FCLT              | yes | yes | yes | b0475                                                                                                     | DB01911,DB02188, |
|          | R_FDMO              | no  | no  | no  | b0935                                                                                                     | -                |
|          | R_FDMO2             | no  | no  | no  | b0935                                                                                                     | -                |
|          | R_FDMO3             | no  | no  | no  | b0935                                                                                                     | -                |
|          | R_FDMO4             | no  | no  | no  | b0935                                                                                                     | -                |
|          | R_FDMO6             | no  | no  | no  | b0935                                                                                                     | -                |
|          | R_FE2abcpp          | no  | no  | no  | b3409                                                                                                     | -                |
|          | R_FE2t2pp           | no  | no  | no  | b2392                                                                                                     | -                |
|          | R_FE2t3pp           | no  | no  | no  | b3915                                                                                                     | -                |
|          | R_FE2tpp            | no  | no  | no  | b3040                                                                                                     | -                |
|          | R_FE3DCITabcpp      | no  | no  | no  | ( b4290 and b4289<br>and b4288 and<br>b4287 )                                                             | -                |
|          | R_FE3DCITtonex      | no  | no  | no  | ( b4291 and ( b1252<br>and b3005 and<br>b3006 ) )                                                         | -                |
|          | R_FE3DHBZSabcp<br>p | no  | no  | no  | ( b0592 and b0588<br>and b0590 and<br>b0589 )                                                             | -                |
|          | R_FE3DHBZStonex     | no  | no  | no  | (( b0805 and ( b1252<br>and b3005 and<br>b3006 ) ) or ( b2155<br>and ( b1252 and<br>b3005 and b3006 ) ) ) | -                |
|          | R_FE3HOXabcpp       | no  | no  | no  | ( b0153 and b0151<br>and b0152 )                                                                          | -                |
|          | R_FE3HOXexs         | no  | no  | no  | s0001                                                                                                     | -                |
|          | R_FE3HOXtonex       | no  | no  | no  | ( b0150 and ( b1252<br>and b3005 and<br>b3006 ) )                                                         | -                |
|          | R_FE3Ri             | no  | no  | no  | b3844                                                                                                     | -                |
|          | R_FECRMabcpp        | no  | no  | no  | ( b0153 and b0151<br>and b0152 )                                                                          | -                |
|          | R_FECRMexs          | no  | no  | no  | s0001                                                                                                     | -                |
|          | R_FECRMtonex        | no  | no  | no  | ( b0150 and ( b1252<br>and b3005 and<br>b3006 ) )                                                         | -                |
|          | R_FEENTERabcpp      | no  | no  | no  | ( b0592 and b0588<br>and b0590 and<br>b0589 )                                                             | -                |
|          | R_FEENTERexs        | no  | no  | no  | s0001                                                                                                     | -                |

|           |                |     |     |     |                                                                                                                                                                                                                                   |                                      |
|-----------|----------------|-----|-----|-----|-----------------------------------------------------------------------------------------------------------------------------------------------------------------------------------------------------------------------------------|--------------------------------------|
|           | R_FEENTERtonex | no  | no  | no  | ( b0584 and ( b1252 -<br>and b3005 and<br>b3006 ) )                                                                                                                                                                               | -                                    |
|           | R_FEENTERtpp   | no  | no  | no  | b0591                                                                                                                                                                                                                             | -                                    |
|           | R_FEOXAMabcpp  | no  | no  | no  | ( b0153 and b0151<br>and b0152 )                                                                                                                                                                                                  | -                                    |
|           | R_FEOXAMexs    | no  | no  | no  | s0001                                                                                                                                                                                                                             | -                                    |
|           | R_FEOXAMtonex  | no  | no  | no  | ( b0150 and ( b1252 -<br>and b3005 and<br>b3006 ) )                                                                                                                                                                               | -                                    |
| 1.16.3.1  | R_FEROpp       | no  | no  | no  | b0123                                                                                                                                                                                                                             | -                                    |
|           | R_FHL          | no  | no  | no  | (( b4079 and ( b2481 -<br>and b2482 and<br>b2483 and b2484<br>and b2485 and<br>b2486 and b2487<br>and b2488 and<br>b2489 and b2490 ) )<br>or ( b4079 and ( b2719 and b2720<br>and b2721 and<br>b2722 and b2723<br>and b2724 ) ) ) | -                                    |
| 1.18.1.2  | R_FLDR         | no  | no  | no  | (( b0684 and b3924 ) DB01753,DB03461,DB04184,<br>or ( b2895 and<br>b3924 ) )                                                                                                                                                      | -                                    |
| 1.5.1.30  | R_FLVRx        | no  | no  | no  | b3844                                                                                                                                                                                                                             | DB03461,DB04363,                     |
| 2.1.2.9   | R_FMETTRS      | yes | no  | no  | b3288                                                                                                                                                                                                                             | -                                    |
| 2.7.7.2   | R_FMNAT        | yes | yes | yes | b0025                                                                                                                                                                                                                             | -                                    |
| 1.3.99.1  | R_FRD2         | no  | no  | no  | ( b4151 and b4152<br>and b4153 and<br>b4154 )                                                                                                                                                                                     | DB00730,DB03014,DB03343,DB04<br>631, |
| 1.3.99.1  | R_FRD3         | no  | no  | no  | ( b4151 and b4152<br>and b4153 and<br>b4154 )                                                                                                                                                                                     | DB00730,DB03014,DB03343,DB04<br>631, |
| 2.7.1.56  | R_FRUK         | no  | no  | no  | b2168                                                                                                                                                                                                                             | -                                    |
|           | R_FRULYSDG     | no  | no  | no  | b3371                                                                                                                                                                                                                             | -                                    |
|           | R_FRULYSE      | no  | no  | no  | b4474                                                                                                                                                                                                                             | -                                    |
|           | R_FRULYSK      | no  | no  | no  | b3374                                                                                                                                                                                                                             | -                                    |
|           | R_FRULYSt2pp   | no  | no  | no  | b3370                                                                                                                                                                                                                             | -                                    |
|           | R_FRUpts2pp    | no  | no  | no  | ( b1817 and b1818<br>and b1819 and<br>b2415 and b2416 )                                                                                                                                                                           | -                                    |
|           | R_FRUptspp     | no  | no  | no  | ( b2167 and b2169<br>and b2415 and<br>b2416 )                                                                                                                                                                                     | -                                    |
| 3.5.1.10  | R_FRUURt2rpp   | no  | no  | no  | b4321                                                                                                                                                                                                                             | -                                    |
|           | R_FTHFD        | no  | no  | no  | b1232                                                                                                                                                                                                                             | -                                    |
|           | R_FUCtpp       | no  | no  | no  | b2801                                                                                                                                                                                                                             | -                                    |
|           | R_FUMt2_2pp    | no  | no  | no  | b3528                                                                                                                                                                                                                             | -                                    |
| 2.3.1.157 | R_G1PACT       | yes | yes | no  | b3730                                                                                                                                                                                                                             | -                                    |
| 3.1.3.10  | R_G1PPpp       | no  | no  | no  | b1002                                                                                                                                                                                                                             | -                                    |
| 5.4.3.8   | R_G1SAT        | yes | yes | no  | b0154                                                                                                                                                                                                                             | DB02054,DB02142,                     |
|           | R_G2PPpp       | no  | no  | no  | b4055                                                                                                                                                                                                                             | -                                    |
| 2.3.1.15  | R_G3PAT120     | yes | no  | yes | b4041                                                                                                                                                                                                                             | -                                    |
| 2.3.1.15  | R_G3PAT140     | yes | no  | yes | b4041                                                                                                                                                                                                                             | -                                    |
| 2.3.1.15  | R_G3PAT141     | yes | no  | yes | b4041                                                                                                                                                                                                                             | -                                    |
| 2.3.1.15  | R_G3PAT160     | yes | yes | yes | b4041                                                                                                                                                                                                                             | -                                    |
| 2.3.1.15  | R_G3PAT161     | yes | yes | yes | b4041                                                                                                                                                                                                                             | -                                    |
| 2.3.1.15  | R_G3PAT180     | yes | no  | yes | b4041                                                                                                                                                                                                                             | -                                    |
| 2.3.1.15  | R_G3PAT181     | yes | no  | yes | b4041                                                                                                                                                                                                                             | -                                    |

|          |               |     |     |     |                                                   |                                                         |
|----------|---------------|-----|-----|-----|---------------------------------------------------|---------------------------------------------------------|
|          | R_G3PCabcpp   | no  | no  | no  | ( b3452 and b3453 and b3450 and b3451 )           | -                                                       |
| 1.1.1.94 | R_G3PD2       | yes | yes | no  | b3608                                             | -                                                       |
| 1.1.99.5 | R_G3PD6       | no  | no  | no  | ( b2241 and b2242 and b2243 )                     | -                                                       |
| 1.1.99.5 | R_G3PD7       | no  | no  | no  | ( b2241 and b2242 and b2243 )                     | -                                                       |
|          | R_G3PEabcpp   | no  | no  | no  | ( b3452 and b3453 and b3450 and b3451 )           | -                                                       |
|          | R_G3PGabcpp   | no  | no  | no  | ( b3452 and b3453 and b3450 and b3451 )           | -                                                       |
|          | R_G3Plabcpp   | no  | no  | no  | ( b3452 and b3453 and b3450 and b3451 )           | -                                                       |
|          | R_G3PSabcpp   | no  | no  | no  | ( b3452 and b3453 and b3450 and b3451 )           | -                                                       |
|          | R_G3PT        | no  | no  | no  | b0822                                             | -                                                       |
|          | R_G5SADs      | no  | yes | yes | s0001                                             | -                                                       |
| 1.2.1.41 | R_G5SD        | no  | no  | no  | b0243                                             | -                                                       |
| 3.5.99.6 | R_G6PDA       | no  | no  | no  | b0678                                             | DB02171,DB02445,DB04277,                                |
| 1.1.1.49 | R_G6PDH2r     | no  | no  | no  | b1852                                             | DB03461,                                                |
| 3.1.3.9  | R_G6PP        | no  | no  | no  | b0822                                             | -                                                       |
|          | R_G6Pt6_2pp   | no  | no  | no  | b3666                                             | -                                                       |
| 3.1.3.10 | R_GAL1PPpp    | no  | no  | no  | b1002                                             | -                                                       |
|          | R_GALabcpp    | no  | no  | no  | ( b2149 and b2150 and b2148 )                     | -                                                       |
| 4.2.1.42 | R_GALCTD      | no  | no  | no  | b3128                                             | -                                                       |
|          | R_GALCTLO     | no  | no  | no  | b4358                                             | -                                                       |
| 4.2.1.6  | R_GALCTND     | no  | no  | no  | b4478                                             | -                                                       |
|          | R_GALCTNLt2pp | no  | no  | no  | b4356                                             | -                                                       |
|          | R_GALCTNt2pp  | no  | no  | no  | b3691                                             | -                                                       |
| 5.1.3.3  | R_GALM2pp     | no  | no  | no  | b0756                                             | DB01861,                                                |
| 3.2.1.22 | R_GALS3       | no  | no  | no  | b4119                                             | DB03965,                                                |
|          | R_GALT1       | no  | no  | no  | b3628                                             | -                                                       |
|          | R_GALt2pp     | no  | no  | no  | b2943                                             | -                                                       |
|          | R_GALTptspp   | no  | no  | no  | ( b2094 and b2093 and b2092 and b2415 and b2416 ) | -                                                       |
| 2.7.7.9  | R_GALUi       | no  | no  | no  | b1236                                             | -                                                       |
|          | R_GALURt2rpp  | no  | no  | no  | b3093                                             | -                                                       |
|          | R_GAM6Pt6_2pp | no  | no  | no  | b3666                                             | -                                                       |
|          | R_GAMptspp    | no  | no  | no  | ( b1817 and b1818 and b1819 and b2415 and b2416 ) | -                                                       |
| 1.2.1.12 | R_GAPD        | yes | no  | no  | b1779                                             | DB02059,DB02205,DB03211,DB0331,DB03814,DB03893,DB04477, |
| 2.1.2.2  | R_GARFT       | no  | no  | no  | b2500                                             | DB02540,DB02794,DB03546,DB04264,                        |
|          | R_GART        | no  | no  | no  | b1849                                             | -                                                       |
| 1.2.1.21 | R_GCALDD      | no  | yes | no  | b1415                                             | -                                                       |
|          | R_GDMANE      | no  | no  | no  | b2052                                             | -                                                       |
|          | R_GDPMNH      | no  | no  | no  | b2051                                             | -                                                       |
|          | R_GDPMNP      | no  | no  | no  | b2467                                             | -                                                       |
| 2.6.1.16 | R_GF6PTA      | yes | yes | no  | b3729                                             | DB02445,DB02446,DB03814,DB04184,                        |
|          | R_GGGABADr    | no  | no  | no  | b1300                                             | -                                                       |
|          | R_GGGABAH     | no  | no  | no  | b1298                                             | -                                                       |
|          | R_GGPTRCO     | no  | no  | no  | b1301                                             | -                                                       |

|          |               |     |     |     |                                                                                                                                           |                                  |
|----------|---------------|-----|-----|-----|-------------------------------------------------------------------------------------------------------------------------------------------|----------------------------------|
|          | R_GGPTRCS     | no  | no  | no  | b1297                                                                                                                                     | -                                |
| 2.1.2.1  | R_GHMT2r      | no  | no  | no  | b2551                                                                                                                                     | DB02067,DB02718,DB02800,DB02824, |
| 2.7.4.8  | R_GK1         | yes | yes | yes | b3648                                                                                                                                     | -                                |
| 2.4.1.18 | R_GLBRAN2     | no  | no  | no  | b3432                                                                                                                                     | -                                |
|          | R_GLCabcpp    | no  | no  | no  | ( b2149 and b2150 and b2148 )                                                                                                             | -                                |
| 2.3.1.79 | R_GLCATr      | no  | no  | no  | b0459                                                                                                                                     | -                                |
|          | R_GLCptspp    | no  | no  | no  | (( b2417 and b1101 and b2415 and b2416 ) or ( b1817 and b1818 and b1819 and b2415 and b2416 ) or ( b2417 and b1621 and b2415 and b2416 )) | -                                |
| 4.1.2.20 | R_GLCRAL      | no  | no  | no  | b3126                                                                                                                                     | -                                |
| 2.4.1.21 | R_GLCS1       | no  | no  | no  | b3429                                                                                                                                     | -                                |
|          | R_GLCt2pp     | no  | no  | no  | b2943                                                                                                                                     | -                                |
|          | R_GLCtexi     | no  | no  | no  | b4036                                                                                                                                     | -                                |
|          | R_GLCTR1      | no  | no  | no  | b3631                                                                                                                                     | -                                |
|          | R_GLCTR2      | no  | no  | no  | b3627                                                                                                                                     | -                                |
|          | R_GLCTR3      | no  | no  | no  | b3626                                                                                                                                     | -                                |
|          | R_GLDBRAN2    | no  | no  | no  | b3431                                                                                                                                     | -                                |
| 2.7.7.27 | R_GLGC        | no  | no  | no  | b3430                                                                                                                                     | DB01774,DB02983,                 |
|          | R_GLNabcpp    | no  | no  | no  | ( b0811 and b0810 and b0809 )                                                                                                             | -                                |
| 6.1.1.18 | R_GLNTRS      | yes | no  | yes | b0680                                                                                                                                     | -                                |
|          | R_GLTPD       | no  | no  | no  | b2091                                                                                                                                     | -                                |
| 2.7.2.11 | R_GLU5K       | no  | no  | no  | b0242                                                                                                                                     | -                                |
|          | R_GLUabcpp    | no  | no  | no  | ( b0655 and b0654 and b0653 and b0652 )                                                                                                   | -                                |
|          | R_GLUABUt7pp  | no  | no  | no  | b1492                                                                                                                                     | -                                |
| 6.3.2.2  | R_GLUCYS      | no  | no  | no  | b2688                                                                                                                                     | -                                |
| 1.4.1.4  | R_GLUDy       | no  | no  | no  | b1761                                                                                                                                     | -                                |
| 3.5.1.2  | R_GLUNpp      | no  | no  | no  | b2957                                                                                                                                     | DB04522,                         |
| 2.4.2.14 | R_GLUPRT      | no  | yes | no  | b2312                                                                                                                                     | DB03942,DB04296,                 |
| 5.1.1.3  | R_GLUR        | yes | yes | no  | b3967                                                                                                                                     | -                                |
| 1.4.1.13 | R_GLUSy       | no  | no  | no  | ( b3212 and b3213 )                                                                                                                       | -                                |
|          | R_GLUt2rpp    | no  | no  | no  | b4077                                                                                                                                     | -                                |
|          | R_GLUt4pp     | no  | no  | no  | b3653                                                                                                                                     | -                                |
| 6.1.1.17 | R_GLUTRR      | yes | yes | yes | b1210                                                                                                                                     | -                                |
|          | R_GLUTRS      | yes | yes | yes | b2400                                                                                                                                     | -                                |
| 4.1.1.47 | R_GLXCL       | no  | no  | no  | b0507                                                                                                                                     | -                                |
|          | R_GLYALDtpp   | no  | no  | no  | b3927                                                                                                                                     | -                                |
| 2.3.1.29 | R_GLYAT       | no  | no  | no  | b3617                                                                                                                                     | -                                |
|          | R_GLYBabcpp   | no  | no  | no  | ( b2128 and b2129 and b2130 and b2131 )                                                                                                   | -                                |
|          | R_GLYBt2pp    | no  | no  | no  | b1801                                                                                                                                     | -                                |
|          | R_GLYC3Pabcpp | no  | no  | no  | ( b3452 and b3453 and b3450 and b3451 )                                                                                                   | -                                |
|          | R_GLYC3Pt6pp  | no  | no  | no  | b2240                                                                                                                                     | -                                |
| 1.1.1.6  | R_GLYCDx      | no  | no  | no  | b3945                                                                                                                                     | -                                |
| 2.7.1.31 | R_GLYCK       | no  | no  | no  | b0514                                                                                                                                     | -                                |
| 2.7.1.31 | R_GLYCK2      | no  | no  | no  | b3124                                                                                                                                     | -                                |
|          | R_GLYCL       | no  | no  | no  | ( b2904 and b2903 and b2905 and b0116 )                                                                                                   | -                                |

|          |              |     |     |     |                                               |                                                      |
|----------|--------------|-----|-----|-----|-----------------------------------------------|------------------------------------------------------|
|          | R_GLYCLT4pp  | no  | no  | no  | b4067                                         | -                                                    |
|          | R_GLYCTO2    | no  | no  | no  | ( b2979 and b4467<br>and b4468 )              | -                                                    |
|          | R_GLYCTO3    | no  | no  | no  | ( b2979 and b4467<br>and b4468 )              | -                                                    |
|          | R_GLYCTO4    | no  | no  | no  | ( b2979 and b4467<br>and b4468 )              | -                                                    |
| 2.7.1.30 | R_GLYK       | no  | no  | no  | b3926                                         | DB02937,                                             |
| 3.1.2.6  | R_GLYOX      | no  | no  | no  | b0212                                         | DB03889,DB04184,DB04399,                             |
|          | R_GLYt4pp    | no  | no  | no  | b0007                                         | -                                                    |
| 4.2.1.47 | R_GMAND      | no  | no  | no  | b2053                                         | -                                                    |
|          | R_GMHEPAT    | no  | no  | no  | b3052                                         | -                                                    |
|          | R_GMHEPK     | no  | no  | no  | b3052                                         | -                                                    |
|          | R_GMHEPPA    | no  | no  | no  | b0200                                         | -                                                    |
| 1.7.1.7  | R_GMPR       | no  | no  | no  | b0104                                         | -                                                    |
| 6.3.5.2  | R_GMPS2      | no  | yes | no  | b2507                                         | DB02212,                                             |
| 1.1.1.44 | R_GND        | no  | no  | no  | b2029                                         | DB02212,DB03962,                                     |
|          | R_GOFUCR     | no  | no  | no  | b2052                                         | -                                                    |
|          | R_GP4GH      | no  | no  | no  | b0049                                         | -                                                    |
| 3.1.4.46 | R_GPDDA1     | no  | no  | no  | b3449                                         | -                                                    |
| 3.1.4.46 | R_GPDDA1pp   | no  | no  | no  | b2239                                         | -                                                    |
| 3.1.4.46 | R_GPDDA2     | no  | no  | no  | b3449                                         | -                                                    |
| 3.1.4.46 | R_GPDDA2pp   | no  | no  | no  | b2239                                         | -                                                    |
| 3.1.4.46 | R_GPDDA3     | no  | no  | no  | b3449                                         | -                                                    |
| 3.1.4.46 | R_GPDDA3pp   | no  | no  | no  | b2239                                         | -                                                    |
| 3.1.4.46 | R_GPDDA4     | no  | no  | no  | b3449                                         | -                                                    |
| 3.1.4.46 | R_GPDDA4pp   | no  | no  | no  | b2239                                         | -                                                    |
| 3.1.4.46 | R_GPDDA5     | no  | no  | no  | b3449                                         | -                                                    |
| 3.1.4.46 | R_GPDDA5pp   | no  | no  | no  | b2239                                         | -                                                    |
| 2.5.1.10 | R_GRTT       | yes | yes | yes | b0421                                         | DB02782,                                             |
|          | R_GSNK       | no  | no  | no  | b0477                                         | -                                                    |
|          | R_GSNt2pp    | no  | no  | no  | b2964                                         | -                                                    |
| 3.5.1.78 | R_GSPMDA     | no  | no  | no  | b2988                                         | -                                                    |
| 6.3.1.8  | R_GSPMDS     | no  | no  | no  | b2988                                         | -                                                    |
| 1.8.1.7  | R_GTHOr      | no  | no  | no  | b3500                                         | DB00336,DB01644,DB02553,DB02<br>895,DB03310,DB03867, |
|          | R_GTHRDabcpp | no  | no  | no  | ( b0829 and b0830<br>and b0831 and<br>b0832 ) | -                                                    |
|          | R_GTHRDHpp   | no  | no  | no  | b3447                                         | -                                                    |
| 6.3.2.3  | R_GTHS       | no  | no  | no  | b2947                                         | -                                                    |
| 3.5.4.16 | R_GTPCI      | yes | yes | yes | b2153                                         | -                                                    |
|          | R_GTPCII2    | yes | yes | yes | b1277                                         | -                                                    |
| 3.6.1.40 | R_GTPDPDP    | no  | no  | no  | b3779                                         | -                                                    |
| 2.7.6.5  | R_GTPDPK     | no  | no  | no  | b2784                                         | DB02836,                                             |
|          | R_GTPHs      | no  | no  | no  | s0001                                         | -                                                    |
| 3.5.4.3  | R_GUAD       | no  | no  | no  | b2883                                         | -                                                    |
|          | R_GUAt2pp    | no  | no  | no  | b3654                                         | -                                                    |
|          | R_GUAtex     | no  | no  | no  | b0411                                         | -                                                    |
| 5.3.1.12 | R_GUI1       | no  | no  | no  | b3092                                         | -                                                    |
| 5.3.1.12 | R_GUI2       | no  | no  | no  | b3092                                         | -                                                    |
|          | R_H2St1pp    | no  | no  | no  | s0001                                         | -                                                    |
|          | R_H2tpp      | no  | no  | no  | s0001                                         | -                                                    |
|          | R_HBZOPT     | yes | yes | no  | b4040                                         | -                                                    |
|          | R_HCINNt2rpp | no  | no  | no  | b0353                                         | -                                                    |
| 2.1.1.10 | R_HCYSMT     | no  | no  | no  | b0261                                         | -                                                    |
|          | R_HCYSMT2    | no  | no  | no  | b0261                                         | -                                                    |
|          | R_HDCAtexi   | no  | no  | no  | b2344                                         | -                                                    |
|          | R_HDCEAtexi  | no  | no  | no  | b2344                                         | -                                                    |
| 5.3.3.8  | R_HDCOAI     | no  | no  | no  | b3846                                         | -                                                    |
|          | R_HEMEOS     | no  | no  | no  | b0428                                         | -                                                    |
|          | R_HEPK1      | no  | no  | no  | b3630                                         | -                                                    |
|          | R_HEPK2      | no  | no  | no  | b3625                                         | -                                                    |

|            |               |     |     |     |                                                         |                                                                          |
|------------|---------------|-----|-----|-----|---------------------------------------------------------|--------------------------------------------------------------------------|
|            | R_HEPT1       | no  | no  | no  | b3621                                                   | -                                                                        |
|            | R_HEPT2       | no  | no  | no  | b3620                                                   | -                                                                        |
|            | R_HEPT3       | no  | no  | no  | b3632                                                   | -                                                                        |
|            | R_HEPT4       | yes | no  | no  | b3623                                                   | -                                                                        |
| 2.7.1.50   | R_HETZK       | no  | no  | no  | b2104                                                   | DB01769,                                                                 |
| 2.7.1.1    | R_HEX1        | no  | no  | no  | b2388                                                   | -                                                                        |
| 2.7.1.1    | R_HEX7        | no  | no  | no  | b0394                                                   | -                                                                        |
|            | R_HEXt2rpp    | no  | no  | no  | b2223                                                   | -                                                                        |
|            | R_HG2abcpp    | no  | no  | no  | b3469                                                   | -                                                                        |
|            | R_HG2t3pp     | no  | no  | no  | b3915                                                   | -                                                                        |
|            | R_HISabcpp    | no  | no  | no  | ( b2309 and b2307<br>and b2306 and<br>b2308 )           | -                                                                        |
|            | R_HIS2rpp     | no  | no  | no  | b0112                                                   | -                                                                        |
| 1.1.1.23   | R_HISTD       | no  | yes | no  | b2020                                                   | DB04077,DB04447,                                                         |
| 3.1.3.15   | R_HISTP       | no  | yes | no  | b2022                                                   | -                                                                        |
| 6.1.1.21   | R_HISTR       | yes | no  | yes | b2514                                                   | -                                                                        |
|            | R_HKNDDH      | no  | no  | no  | b0349                                                   | -                                                                        |
|            | R_HKNTDH      | no  | no  | no  | b0349                                                   | -                                                                        |
| 4.3.1.8    | R_HMBS        | yes | yes | yes | b3805                                                   | -                                                                        |
|            | R_HOPNTAL     | no  | no  | no  | b0352                                                   | -                                                                        |
|            | R_HPPK2       | yes | yes | no  | b0142                                                   | -                                                                        |
| 1.13.11.16 | R_HPPPND0     | no  | no  | no  | b0348                                                   | -                                                                        |
|            | R_HPPPnt2rpp  | no  | no  | no  | b0353                                                   | -                                                                        |
| 5.3.1.22   | R_HPYRI       | no  | no  | no  | b0508                                                   | -                                                                        |
| 2.7.1.39   | R_HSK         | no  | yes | no  | b0003                                                   | DB01660,                                                                 |
| 2.3.1.46   | R_HSST        | no  | yes | no  | b4013                                                   | -                                                                        |
| 2.6.1.9    | R_HSTPT       | no  | yes | no  | b2021                                                   | DB01813,DB02142,DB03997,                                                 |
|            | R_HXAND       | no  | no  | no  | ( b2866 and b2867<br>and b2868 )                        | -                                                                        |
| 2.8.3.8    | R_HXCT        | no  | no  | no  | ( b2221 and b2222 )                                     | -                                                                        |
| 1.1.1.42   | R_ICDHyr      | no  | yes | no  | b1136                                                   | DB03461,DB03806,DB04530,                                                 |
| 5.4.99.6   | R_ICHORS      | no  | no  | no  | b2265                                                   | -                                                                        |
|            | R_ICHORSi     | no  | no  | no  | b0593                                                   | -                                                                        |
| 3.3.2.1    | R_ICHORT      | no  | no  | no  | b0595                                                   | -                                                                        |
| 4.1.3.1    | R_ICL         | no  | no  | no  | b4015                                                   | -                                                                        |
|            | R_IDOND       | no  | no  | no  | b4267                                                   | -                                                                        |
|            | R_IDOND2      | no  | no  | no  | b4267                                                   | -                                                                        |
|            | R_IDONt2rpp   | no  | no  | no  | b4265                                                   | -                                                                        |
|            | R_IG3PS       | no  | yes | yes | ( b2023 and b2025 )                                     | -                                                                        |
| 4.2.1.19   | R_IGPDH       | no  | yes | no  | b2022                                                   | -                                                                        |
| 4.1.1.48   | R_IGPS        | no  | yes | no  | b1262                                                   | DB03543,DB04143,                                                         |
|            | R_ILEabcpp    | no  | no  | no  | ( b3454 and b3455<br>and b3457 and<br>b3460 and b3456 ) | -                                                                        |
|            | R_ILEt2rpp    | no  | no  | no  | b0401                                                   | -                                                                        |
| 2.6.1.42   | R_ILETA       | no  | yes | no  | b3770                                                   | DB01813,DB02142,DB02635,DB03<br>993,DB04063,                             |
| 6.1.1.5    | R_ILETTRS     | no  | no  | yes | b0026                                                   | DB00410,DB01755,                                                         |
| 3.5.4.10   | R_IMPC        | no  | yes | no  | b4006                                                   | DB03442,DB04057,                                                         |
| 1.1.1.205  | R_IMPD        | no  | no  | no  | b2508                                                   | DB00811,DB01693,DB01915,DB01<br>945,DB03055,DB03070,DB03122,D<br>B03948, |
|            | R_INDOLEt2pp  | no  | no  | no  | ( b3265 and b3266 )                                     | -                                                                        |
|            | R_INDOLEt2rpp | no  | no  | no  | b3161                                                   | -                                                                        |
|            | R_INOSTt4pp   | no  | no  | no  | b3679                                                   | -                                                                        |
| 3.2.2.8    | R_INSH        | no  | no  | no  | b0030                                                   | -                                                                        |
| 2.7.1.73   | R_INSK        | no  | no  | no  | b0477                                                   | -                                                                        |
|            | R_INSt2pp     | no  | no  | no  | b2964                                                   | -                                                                        |
|            | R_INSt2rpp    | no  | no  | no  | b2406                                                   | -                                                                        |



|           |                 |     |     |     |                                                                                                           |                                                                                                                  |
|-----------|-----------------|-----|-----|-----|-----------------------------------------------------------------------------------------------------------|------------------------------------------------------------------------------------------------------------------|
| 5.3.3.2   | R_INStex        | no  | no  | no  | b0411                                                                                                     | -                                                                                                                |
|           | R_IPDDI         | no  | no  | no  | b2889                                                                                                     | DB01799,DB02480,DB03165,DB04170,                                                                                 |
| 1.1.1.85  | R_IPDPS         | yes | no  | no  | b0029                                                                                                     | -                                                                                                                |
| 4.2.1.33  | R_IPMD          | no  | yes | no  | b0073                                                                                                     | -                                                                                                                |
|           | R_IPPMIa        | no  | yes | no  | ( b0071 and b0072 )                                                                                       | -                                                                                                                |
| 4.2.1.33  | R_IPPMIb        | no  | yes | no  | ( b0071 and b0072 )                                                                                       | -                                                                                                                |
| 4.1.3.12  | R_IPPS          | no  | yes | no  | b0074                                                                                                     | -                                                                                                                |
|           | R_K2L4Aabcpp    | yes | yes | yes | b0914                                                                                                     | -                                                                                                                |
|           | R_Kabcpp        | no  | no  | no  | ( b0698 and b0697 and b0696 )                                                                             | -                                                                                                                |
| 1.1.1.86  | R_KARA1         | no  | yes | no  | b3774                                                                                                     | DB03387,DB04497,                                                                                                 |
| 1.1.1.86  | R_KARA2         | no  | yes | yes | b3774                                                                                                     | DB03387,DB04497,                                                                                                 |
|           | R_KAS15         | no  | no  | no  | b1091                                                                                                     | -                                                                                                                |
| 2.7.7.38  | R_KDOCT2        | yes | yes | yes | b0918                                                                                                     | DB02344,DB04482,                                                                                                 |
| 3.1.3.45  | R_KDOPP         | no  | yes | yes | b3198                                                                                                     | DB03814,                                                                                                         |
| 4.1.2.16  | R_KDOPS         | yes | yes | yes | b1215                                                                                                     | -                                                                                                                |
| 1.1.2.3   | R_L_LACD2       | no  | no  | no  | b3605                                                                                                     | DB02164,DB03014,                                                                                                 |
| 1.1.2.3   | R_L_LACD3       | no  | no  | no  | b3605                                                                                                     | DB02164,DB03014,                                                                                                 |
|           | R_LA4NTpp       | no  | no  | no  | b2257                                                                                                     | -                                                                                                                |
| 3.2.1.23  | R_LACZ          | no  | no  | no  | b0344                                                                                                     | DB01862,DB01920,DB02228,DB02294,DB02376,DB02525,DB02632,DB02748,DB03398,DB04155,DB04184,DB04282,DB04382,DB04530, |
| 3.2.1.108 | R_LACZpp        | no  | no  | no  | b2132                                                                                                     | -                                                                                                                |
|           | R_LADGMDH       | no  | no  | no  | b1326                                                                                                     | -                                                                                                                |
| 1.1.1.21  | R_LALDO2x       | no  | no  | no  | b3945                                                                                                     | DB01689,DB02020,DB02021,DB02101,DB02132,DB02518,DB02712,DB02834,DB02994,DB03461,                                 |
| 1.2.1.21  | R_LALGP         | no  | no  | no  | b0237                                                                                                     | -                                                                                                                |
|           | R_LCADi         | no  | no  | no  | b1415                                                                                                     | -                                                                                                                |
| 1.1.1.77  | R_LCARS         | no  | no  | no  | b2799                                                                                                     | DB02059,                                                                                                         |
|           | R_LCTStpp       | no  | no  | no  | b0343                                                                                                     | -                                                                                                                |
| 1.1.2.4   | R_LDH_D2        | no  | no  | no  | b2133                                                                                                     | -                                                                                                                |
|           | R_LEUabcpp      | no  | no  | no  | (( b3454 and b3455 and b3457 and b3460 and b3456 ) or ( b3454 and b3455 and b3457 and b3458 and b3456 ) ) | -                                                                                                                |
| 6.1.1.4   | R_LEUt2rpp      | no  | no  | no  | b0401                                                                                                     | -                                                                                                                |
|           | R_LEUTRS        | yes | no  | yes | b0642                                                                                                     | -                                                                                                                |
| 4.4.1.5   | R_LGTHL         | no  | no  | no  | b1651                                                                                                     | DB03130,DB03330,DB03602,DB04132,                                                                                 |
|           | R_LIPAabcpp     | yes | no  | yes | b0914                                                                                                     | -                                                                                                                |
|           | R_LIPACabcpp    | yes | no  | yes | b0914                                                                                                     | -                                                                                                                |
|           | R_LIPAHT2ex     | no  | no  | no  | b0622                                                                                                     | -                                                                                                                |
|           | R_LIPAHTex      | no  | no  | no  | b0622                                                                                                     | -                                                                                                                |
| 2.4.1.182 | R_LPADSS        | yes | yes | no  | b0182                                                                                                     | -                                                                                                                |
| 3.1.1.5   | R_LPLIPAL1A120p | no  | no  | no  | b0494                                                                                                     | DB02364,DB02983,DB04519,                                                                                         |
|           | p               |     |     |     |                                                                                                           |                                                                                                                  |
| 3.1.1.5   | R_LPLIPAL1A140p | no  | no  | no  | b0494                                                                                                     | DB02364,DB02983,DB04519,                                                                                         |
|           | p               |     |     |     |                                                                                                           |                                                                                                                  |
| 3.1.1.5   | R_LPLIPAL1A141p | no  | no  | no  | b0494                                                                                                     | DB02364,DB02983,DB04519,                                                                                         |
|           | p               |     |     |     |                                                                                                           |                                                                                                                  |
| 3.1.1.5   | R_LPLIPAL1A160p | no  | no  | no  | b0494                                                                                                     | DB02364,DB02983,DB04519,                                                                                         |
|           | p               |     |     |     |                                                                                                           |                                                                                                                  |

|         |                 |    |    |    |       |                          |
|---------|-----------------|----|----|----|-------|--------------------------|
| 3.1.1.5 | R_LPLIPAL1A161p | no | no | no | b0494 | DB02364,DB02983,DB04519, |
|         | p               |    |    |    |       |                          |
| 3.1.1.5 | R_LPLIPAL1A180p | no | no | no | b0494 | DB02364,DB02983,DB04519, |
|         | p               |    |    |    |       |                          |
| 3.1.1.5 | R_LPLIPAL1A181p | no | no | no | b0494 | DB02364,DB02983,DB04519, |
|         | p               |    |    |    |       |                          |
| 3.1.1.5 | R_LPLIPAL1E120p | no | no | no | b0494 | DB02364,DB02983,DB04519, |
|         | p               |    |    |    |       |                          |
| 3.1.1.5 | R_LPLIPAL1E140p | no | no | no | b0494 | DB02364,DB02983,DB04519, |
|         | p               |    |    |    |       |                          |
| 3.1.1.5 | R_LPLIPAL1E141p | no | no | no | b0494 | DB02364,DB02983,DB04519, |
|         | p               |    |    |    |       |                          |
| 3.1.1.5 | R_LPLIPAL1E160p | no | no | no | b0494 | DB02364,DB02983,DB04519, |
|         | p               |    |    |    |       |                          |
| 3.1.1.5 | R_LPLIPAL1E161p | no | no | no | b0494 | DB02364,DB02983,DB04519, |
|         | p               |    |    |    |       |                          |
| 3.1.1.5 | R_LPLIPAL1E180p | no | no | no | b0494 | DB02364,DB02983,DB04519, |
|         | p               |    |    |    |       |                          |
| 3.1.1.5 | R_LPLIPAL1E181p | no | no | no | b0494 | DB02364,DB02983,DB04519, |
|         | p               |    |    |    |       |                          |
| 3.1.1.5 | R_LPLIPAL1G120p | no | no | no | b0494 | DB02364,DB02983,DB04519, |
|         | p               |    |    |    |       |                          |
| 3.1.1.5 | R_LPLIPAL1G140p | no | no | no | b0494 | DB02364,DB02983,DB04519, |
|         | p               |    |    |    |       |                          |
| 3.1.1.5 | R_LPLIPAL1G141p | no | no | no | b0494 | DB02364,DB02983,DB04519, |
|         | p               |    |    |    |       |                          |
| 3.1.1.5 | R_LPLIPAL1G160p | no | no | no | b0494 | DB02364,DB02983,DB04519, |
|         | p               |    |    |    |       |                          |
| 3.1.1.5 | R_LPLIPAL1G161p | no | no | no | b0494 | DB02364,DB02983,DB04519, |
|         | p               |    |    |    |       |                          |
| 3.1.1.5 | R_LPLIPAL1G180p | no | no | no | b0494 | DB02364,DB02983,DB04519, |
|         | p               |    |    |    |       |                          |
| 3.1.1.5 | R_LPLIPAL1G181p | no | no | no | b0494 | DB02364,DB02983,DB04519, |
|         | p               |    |    |    |       |                          |
| 3.1.1.5 | R_LPLIPAL2A120  | no | no | no | b3825 | DB02364,DB02983,DB04519, |
| 3.1.1.5 | R_LPLIPAL2A140  | no | no | no | b3825 | DB02364,DB02983,DB04519, |
| 3.1.1.5 | R_LPLIPAL2A141  | no | no | no | b3825 | DB02364,DB02983,DB04519, |
| 3.1.1.5 | R_LPLIPAL2A160  | no | no | no | b3825 | DB02364,DB02983,DB04519, |
| 3.1.1.5 | R_LPLIPAL2A161  | no | no | no | b3825 | DB02364,DB02983,DB04519, |
| 3.1.1.5 | R_LPLIPAL2A180  | no | no | no | b3825 | DB02364,DB02983,DB04519, |
| 3.1.1.5 | R_LPLIPAL2A181  | no | no | no | b3825 | DB02364,DB02983,DB04519, |
|         | R_LPLIPAL2ATE12 | no | no | no | b3825 | -                        |
|         | 0               |    |    |    |       |                          |
|         | R_LPLIPAL2ATE14 | no | no | no | b3825 | -                        |
|         | 0               |    |    |    |       |                          |
|         | R_LPLIPAL2ATE14 | no | no | no | b3825 | -                        |
|         | 1               |    |    |    |       |                          |
|         | R_LPLIPAL2ATE16 | no | no | no | b3825 | -                        |
|         | 0               |    |    |    |       |                          |
|         | R_LPLIPAL2ATE16 | no | no | no | b3825 | -                        |
|         | 1               |    |    |    |       |                          |
|         | R_LPLIPAL2ATE18 | no | no | no | b3825 | -                        |
|         | 0               |    |    |    |       |                          |
|         | R_LPLIPAL2ATE18 | no | no | no | b3825 | -                        |
|         | 1               |    |    |    |       |                          |
|         | R_LPLIPAL2ATG12 | no | no | no | b3825 | -                        |
|         | 0               |    |    |    |       |                          |
|         | R_LPLIPAL2ATG14 | no | no | no | b3825 | -                        |
|         | 0               |    |    |    |       |                          |
|         | R_LPLIPAL2ATG14 | no | no | no | b3825 | -                        |
|         | 1               |    |    |    |       |                          |
|         | R_LPLIPAL2ATG16 | no | no | no | b3825 | -                        |
|         | 0               |    |    |    |       |                          |

|          |                      |     |    |    |                                               |                          |
|----------|----------------------|-----|----|----|-----------------------------------------------|--------------------------|
|          | R_LPLIPAL2ATG16<br>1 | no  | no | no | b3825                                         | -                        |
|          | R_LPLIPAL2ATG18<br>0 | no  | no | no | b3825                                         | -                        |
|          | R_LPLIPAL2ATG18<br>1 | no  | no | no | b3825                                         | -                        |
| 3.1.1.5  | R_LPLIPAL2E120       | no  | no | no | b3825                                         | DB02364,DB02983,DB04519, |
| 3.1.1.5  | R_LPLIPAL2E140       | no  | no | no | b3825                                         | DB02364,DB02983,DB04519, |
| 3.1.1.5  | R_LPLIPAL2E141       | no  | no | no | b3825                                         | DB02364,DB02983,DB04519, |
| 3.1.1.5  | R_LPLIPAL2E160       | no  | no | no | b3825                                         | DB02364,DB02983,DB04519, |
| 3.1.1.5  | R_LPLIPAL2E161       | no  | no | no | b3825                                         | DB02364,DB02983,DB04519, |
| 3.1.1.5  | R_LPLIPAL2E180       | no  | no | no | b3825                                         | DB02364,DB02983,DB04519, |
| 3.1.1.5  | R_LPLIPAL2E181       | no  | no | no | b3825                                         | DB02364,DB02983,DB04519, |
| 3.1.1.5  | R_LPLIPAL2G120       | no  | no | no | b3825                                         | DB02364,DB02983,DB04519, |
| 3.1.1.5  | R_LPLIPAL2G140       | no  | no | no | b3825                                         | DB02364,DB02983,DB04519, |
| 3.1.1.5  | R_LPLIPAL2G141       | no  | no | no | b3825                                         | DB02364,DB02983,DB04519, |
| 3.1.1.5  | R_LPLIPAL2G160       | no  | no | no | b3825                                         | DB02364,DB02983,DB04519, |
| 3.1.1.5  | R_LPLIPAL2G161       | no  | no | no | b3825                                         | DB02364,DB02983,DB04519, |
| 3.1.1.5  | R_LPLIPAL2G180       | no  | no | no | b3825                                         | DB02364,DB02983,DB04519, |
| 3.1.1.5  | R_LPLIPAL2G181       | no  | no | no | b3825                                         | DB02364,DB02983,DB04519, |
|          | R_LSERDHr            | no  | no | no | b1539                                         | -                        |
|          | R_LYSabcpp           | no  | no | no | ( b2310 and b2307<br>and b2306 and<br>b2308 ) | -                        |
|          | R_LYSt2pp            | no  | no | no | b2156                                         | -                        |
|          | R_LYSt3pp            | no  | no | no | b2923                                         | -                        |
|          | R_LYXI               | no  | no | no | b3903                                         | -                        |
|          | R_LYXt2pp            | no  | no | no | b3907                                         | -                        |
| 1.1.1.17 | R_M1PD               | no  | no | no | b3600                                         | -                        |
|          | R_MACPD              | yes | no | no | b2323                                         | -                        |
| 1.1.1.83 | R_MALDDH             | no  | no | no | b1800                                         | -                        |
|          | R_MALDt2_2pp         | no  | no | no | b3528                                         | -                        |
|          | R_MALt2_2pp          | no  | no | no | b3528                                         | -                        |
|          | R_MALTabcpp          | no  | no | no | ( b4034 and b4033<br>and b4032 and<br>b4035 ) | -                        |
| 2.3.1.79 | R_MALTATr            | no  | no | no | b0459                                         | -                        |
|          | R_MALTHXabcpp        | no  | no | no | ( b4034 and b4033<br>and b4032 and<br>b4035 ) | -                        |
|          | R_MALTHXtexi         | no  | no | no | b4036                                         | -                        |
|          | R_MALTPTabcpp        | no  | no | no | ( b4034 and b4033<br>and b4032 and<br>b4035 ) | -                        |
|          | R_MALTptssp          | no  | no | no | ( b2417 and b1621<br>and b2415 and<br>b2416 ) | -                        |
|          | R_MALTPTtexi         | no  | no | no | b4036                                         | -                        |
|          | R_MALTtexi           | no  | no | no | b4036                                         | -                        |
|          | R_MALTTRabcpp        | no  | no | no | ( b4034 and b4033<br>and b4032 and<br>b4035 ) | -                        |
|          | R_MALTTRtexi         | no  | no | no | b4036                                         | -                        |
|          | R_MALTTTRabcpp       | no  | no | no | ( b4034 and b4033<br>and b4032 and<br>b4035 ) | -                        |
|          | R_MALTTTRtexi        | no  | no | no | b4036                                         | -                        |
| 2.7.7.22 | R_MAN1PT2            | no  | no | no | b2049                                         | -                        |
| 5.3.1.8  | R_MAN6PI             | no  | no | no | b1613                                         | DB02171,DB03042,DB04184, |
|          | R_MAN6Pt6_2pp        | no  | no | no | b3666                                         | -                        |
| 1.1.1.57 | R_MANAO              | no  | no | no | b4323                                         | -                        |
|          | R_MANGLYCptssp       | no  | no | no | ( b0731 and b2415<br>and b2416 )              | -                        |

|           |              |     |     |     |                                                         |                                              |
|-----------|--------------|-----|-----|-----|---------------------------------------------------------|----------------------------------------------|
|           | R_MANPGH     | no  | no  | no  | b0732                                                   | -                                            |
|           | R_MANptspp   | no  | no  | no  | ( b1817 and b1818<br>and b1819 and<br>b2415 and b2416 ) | -                                            |
| 4.2.1.79  | R_MCITD      | no  | no  | no  | b0334                                                   | -                                            |
| 4.1.3.30  | R_MCITL2     | no  | no  | no  | b0331                                                   | -                                            |
| 4.1.3.31  | R_MCITS      | no  | no  | no  | b0333                                                   | -                                            |
| 2.3.1.39  | R_MCOATA     | yes | yes | no  | ( b1094 and b1092 )                                     | -                                            |
| 2.8.1.2   | R_MCPST      | no  | no  | no  | b2521                                                   | DB03352,                                     |
| 1.1.1.37  | R_MDH        | no  | no  | no  | b3236                                                   | DB00336,DB02483,DB03461,                     |
| 1.1.99.16 | R_MDH2       | no  | no  | no  | b2210                                                   | -                                            |
| 1.1.99.16 | R_MDH3       | no  | no  | no  | b2210                                                   | -                                            |
| 1.1.1.38  | R_ME1        | no  | no  | no  | b1479                                                   | DB03680,                                     |
| 1.1.1.40  | R_ME2        | no  | no  | no  | b2463                                                   | DB03461,                                     |
|           | R_MECDPDH2   | yes | yes | yes | b2515                                                   | -                                            |
|           | R_MECDPS     | yes | yes | no  | b2746                                                   | -                                            |
|           | R_MELIBt2pp  | no  | no  | no  | b4120                                                   | -                                            |
|           | R_MELIBt3ipp | no  | no  | no  | b1528                                                   | -                                            |
|           | R_MEPT       | yes | yes | yes | b2747                                                   | -                                            |
|           | R_METabcpp   | no  | no  | no  | ( b0198 and b0199<br>and b0197 )                        | -                                            |
| 2.5.1.6   | R_METAT      | yes | yes | yes | b2942                                                   | DB02212,DB03075,DB03191,DB03<br>611,DB04554, |
|           | R_METDabcpp  | no  | no  | no  | ( b0198 and b0199<br>and b0197 )                        | -                                            |
|           | R_METOX1s    | no  | no  | no  | s0001                                                   | -                                            |
|           | R_METOX2s    | no  | no  | no  | s0001                                                   | -                                            |
| 1.8.4.5   | R_METSOXR1   | no  | no  | no  | (( b4219 and b2582 ) -<br>or ( b4219 and<br>b3781 ) )   | -                                            |
|           | R_METSOXR2   | no  | no  | no  | (( b1778 and b2582 ) -<br>or ( b1778 and<br>b3781 ) )   | -                                            |
| 6.1.1.10  | R_METTRS     | yes | no  | yes | b2114                                                   | DB02151,DB02229,DB03799,DB03<br>816,DB04015, |
|           | R_MG2tpp     | no  | no  | no  | b3816                                                   | -                                            |
|           | R_MG2uabcpp  | no  | no  | no  | b4242                                                   | -                                            |
| 4.2.3.3   | R_MGSA       | no  | no  | no  | b0963                                                   | DB03026,                                     |
| 3.1.3.25  | R_MI1PP      | yes | no  | no  | b2533                                                   | DB01356,DB04493,                             |
| 4.2.1.99  | R_MICITD     | no  | no  | no  | b0118                                                   | -                                            |
|           | R_MLTG1      | no  | no  | no  | b0403                                                   | -                                            |
|           | R_MLTG2      | no  | no  | no  | b0403                                                   | -                                            |
|           | R_MLTG3      | no  | no  | no  | b0403                                                   | -                                            |
|           | R_MLTG4      | no  | no  | no  | b0403                                                   | -                                            |
|           | R_MLTG5      | no  | no  | no  | b0403                                                   | -                                            |
|           | R_MLTP1      | no  | no  | no  | b3417                                                   | -                                            |
|           | R_MLTP2      | no  | no  | no  | b3417                                                   | -                                            |
|           | R_MLTP3      | no  | no  | no  | b3417                                                   | -                                            |
| 4.1.1.41  | R_MMCD       | no  | no  | no  | b2919                                                   | -                                            |
|           | R_MMETt2pp   | no  | no  | no  | b0260                                                   | -                                            |
| 5.4.99.2  | R_MMM2       | no  | no  | no  | b2917                                                   | -                                            |
|           | R_MN2tpp     | no  | no  | no  | b3040                                                   | -                                            |
|           | R_MN6PP      | no  | no  | no  | b0822                                                   | -                                            |
|           | R_MNLptspp   | no  | no  | no  | ( b3599 and b2415<br>and b2416 )                        | -                                            |
| 4.2.1.8   | R_MNNH       | no  | no  | no  | b4322                                                   | -                                            |
|           | R_MNt2pp     | no  | no  | no  | b2392                                                   | -                                            |
|           | R_MOAT       | yes | yes | yes | b3633                                                   | -                                            |
|           | R_MOAT2      | yes | yes | yes | b3633                                                   | -                                            |
|           | R_MOAT3C     | no  | no  | no  | b3624                                                   | -                                            |
| 2.1.2.11  | R_MOHMT      | no  | yes | no  | b0134                                                   | -                                            |

|          |              |     |     |     |                                                                                                                                   |                          |
|----------|--------------|-----|-----|-----|-----------------------------------------------------------------------------------------------------------------------------------|--------------------------|
|          | R_MSO3abcpp  | no  | no  | no  | ( b0936 and b0933 and b0934 )                                                                                                     | -                        |
| 3.2.2.16 | R_MTAN       | no  | no  | no  | b0159                                                                                                                             | -                        |
| 3.5.4.9  | R_MTHFC      | yes | yes | yes | b0529                                                                                                                             | -                        |
| 1.5.1.5  | R_MTHFD      | yes | yes | no  | b0529                                                                                                                             | -                        |
| 1.5.1.20 | R_MTHFR2     | no  | yes | no  | b3941                                                                                                                             | -                        |
| 1.5.3.2  | R_MTRPOX     | no  | no  | no  | b1059                                                                                                                             | -                        |
|          | R_N2Otp      | no  | no  | no  | s0001                                                                                                                             | -                        |
|          | R_NACODA     | no  | no  | no  | b3957                                                                                                                             | -                        |
| 1.6.5.3  | R_NADH10     | no  | no  | no  | b1109                                                                                                                             | -                        |
| 1.6.5.3  | R_NADH16pp   | no  | no  | no  | ( b2276 and b2277 and b2278 and b2279 and b2280 and b2281 and b2282 and b2283 and b2284 and b2285 and b2286 and b2287 and b2288 ) | -                        |
| 1.6.5.3  | R_NADH17pp   | no  | no  | no  | ( b2276 and b2277 and b2278 and b2279 and b2280 and b2281 and b2282 and b2283 and b2284 and b2285 and b2286 and b2287 and b2288 ) | -                        |
| 1.6.5.3  | R_NADH18pp   | no  | no  | no  | ( b2276 and b2277 and b2278 and b2279 and b2280 and b2281 and b2282 and b2283 and b2284 and b2285 and b2286 and b2287 and b2288 ) | -                        |
| 1.6.5.3  | R_NADH5      | no  | no  | no  | b1109                                                                                                                             | -                        |
| 1.6.5.3  | R_NADH9      | no  | no  | no  | b1109                                                                                                                             | -                        |
| 2.7.1.23 | R_NADK       | yes | yes | no  | b2615                                                                                                                             | DB02212,DB03461,         |
| 1.6.99.6 | R_NADPHQR2   | no  | no  | no  | b3028                                                                                                                             | -                        |
| 1.6.99.6 | R_NADPHQR3   | no  | no  | no  | b3028                                                                                                                             | -                        |
| 1.6.99.6 | R_NADPHQR4   | no  | no  | no  | b3028                                                                                                                             | -                        |
| 6.3.1.5  | R_NADS1      | yes | yes | no  | b1740                                                                                                                             | DB02212,DB02596,DB02937, |
| 2.4.2.11 | R_NAMNPP     | no  | no  | no  | b0931                                                                                                                             | DB03814,                 |
|          | R_NAt3_1p5pp | no  | no  | no  | b1186                                                                                                                             | -                        |
|          | R_NAt3_2pp   | no  | no  | no  | b0019                                                                                                                             | -                        |
|          | R_NHFRBO     | no  | no  | no  | ( b2710 and b2711 )                                                                                                               | -                        |
|          | R_NI2abcpp   | no  | no  | no  | b3469                                                                                                                             | -                        |
|          | R_NI2tpp     | no  | no  | no  | b3816                                                                                                                             | -                        |
|          | R_NMNptpp    | no  | no  | no  | b0751                                                                                                                             | -                        |
| 3.5.1.19 | R_NNAM       | no  | no  | no  | b1768                                                                                                                             | -                        |
| 2.7.7.18 | R_NNATr      | yes | yes | yes | b0639                                                                                                                             | -                        |
|          | R_NNDBRT     | no  | no  | no  | b1991                                                                                                                             | -                        |
| 2.4.2.19 | R_NNDPR      | no  | yes | no  | b0109                                                                                                                             | DB02382,DB04294,         |
| 1.7.99.4 | R_NO3R1bpp   | no  | no  | no  | ( ( b2203 and b2206 ) and b2202 and b2205 and b2204 )                                                                             | -                        |
| 1.7.99.4 | R_NO3R2bpp   | no  | no  | no  | ( ( b2203 and b2206 ) and b2202 )                                                                                                 | -                        |

|            |              |     |     |     |                                                                                    |                                                  |
|------------|--------------|-----|-----|-----|------------------------------------------------------------------------------------|--------------------------------------------------|
| 1.14.12.17 | R_NODOx      | no  | no  | no  | b2552                                                                              | DB03014,DB03979,                                 |
| 1.14.12.17 | R_NODOy      | no  | no  | no  | b2552                                                                              | DB03014,DB03979,                                 |
|            | R_NOtpp      | no  | no  | no  | s0001                                                                              | -                                                |
| 4.1.3.36   | R_NPHS       | no  | no  | no  | b2262                                                                              | -                                                |
| 3.1.3.5    | R_NTD10      | no  | no  | no  | b2744                                                                              | DB00811,                                         |
| 3.1.3.5    | R_NTD11      | no  | no  | no  | b2744                                                                              | DB00811,                                         |
| 3.1.3.5    | R_NTD4       | no  | no  | no  | b2744                                                                              | DB00811,                                         |
| 3.1.3.5    | R_NTD7       | no  | no  | no  | b2744                                                                              | DB00811,                                         |
| 3.1.3.5    | R_NTD9       | no  | no  | no  | b2744                                                                              | DB00811,                                         |
| 3.6.1.15   | R_NTP11      | no  | no  | no  | b4394                                                                              | DB01720,DB02331,DB03388,DB03605,DB03647,DB04298, |
| 3.6.1.15   | R_NTP12      | no  | no  | no  | b4394                                                                              | DB01720,DB02331,DB03388,DB03605,DB03647,DB04298, |
| 3.6.1.15   | R_NTP3       | no  | no  | no  | b4161                                                                              | DB01720,DB02331,DB03388,DB03605,DB03647,DB04298, |
| 3.6.1.15   | R_NTP3pp     | no  | no  | no  | b0980                                                                              | DB01720,DB02331,DB03388,DB03605,DB03647,DB04298, |
| 3.6.1.15   | R_NTP5       | no  | no  | no  | b4161                                                                              | DB01720,DB02331,DB03388,DB03605,DB03647,DB04298, |
| 3.6.1.19   | R_NTPP10     | no  | no  | no  | b2954                                                                              | -                                                |
| 3.6.1.19   | R_NTPP11     | no  | no  | no  | b2954                                                                              | -                                                |
|            | R_NTPP6      | no  | no  | no  | b2781                                                                              | -                                                |
|            | R_NTPP8      | no  | no  | no  | b2781                                                                              | -                                                |
| 3.6.1.19   | R_NTPP9      | no  | no  | no  | b2954                                                                              | -                                                |
| 3.1.5.1    | R_NTPTP1     | no  | no  | no  | b0160                                                                              | -                                                |
| 3.1.5.1    | R_NTPTP2     | no  | no  | no  | b0160                                                                              | -                                                |
|            | R_NTRIR2x    | no  | no  | no  | ( b3365 and b3366 )                                                                | -                                                |
|            | R_NTRIR3pp   | no  | no  | no  | ( b4070 and b4071 and b4072 and b4073 )                                            | -                                                |
|            | R_NTRIR4pp   | no  | no  | no  | ( b4070 and b4071 and b4072 and b4073 )                                            | -                                                |
|            | R_O16A4Lpp   | no  | no  | no  | b3622                                                                              | -                                                |
|            | R_O16AP1pp   | no  | no  | no  | ( b2035 and b2027 )                                                                | -                                                |
|            | R_O16AP2pp   | no  | no  | no  | ( b2035 and b2027 )                                                                | -                                                |
|            | R_O16AP3pp   | no  | no  | no  | ( b2035 and b2027 )                                                                | -                                                |
|            | R_O16AT      | no  | no  | no  | b2033                                                                              | -                                                |
|            | R_O16AUNDtpp | no  | no  | no  | b2037                                                                              | -                                                |
|            | R_O16GALFT   | no  | no  | no  | b2034                                                                              | -                                                |
|            | R_O16GLCT1   | no  | no  | no  | b2032                                                                              | -                                                |
|            | R_O2tpp      | no  | yes | no  | s0001                                                                              | -                                                |
| 4.1.1.3    | R_OAADC      | no  | no  | no  | b1850                                                                              | -                                                |
|            | R_OBTFL      | no  | no  | no  | (( ( b0902 and b0903 ) and b2579 ) or ( b0902 and b0903 ) or ( b0902 and b3114 ) ) | -                                                |
|            | R_OCDCAtexi  | no  | no  | no  | b2344                                                                              | -                                                |
|            | R_OCDCEAtexi | no  | no  | no  | b2344                                                                              | -                                                |
|            | R_OCTDPS     | yes | yes | yes | b3187                                                                              | -                                                |
| 5.3.3.8    | R_ODECOAI    | no  | no  | no  | b3846                                                                              | -                                                |
| 2.6.1.52   | R_OHPBAT     | no  | yes | yes | b0907                                                                              | DB02327,                                         |
|            | R_OHPHM      | no  | no  | no  | b2232                                                                              | -                                                |
|            | R_OMBZLM     | no  | no  | no  | b3833                                                                              | -                                                |
|            | R_OMCDC      | no  | yes | no  | b0073                                                                              | -                                                |
|            | R_OMMBLHX    | no  | no  | no  | b0662                                                                              | -                                                |
| 4.1.1.23   | R_OMPDC      | no  | yes | no  | b1281                                                                              | DB01915,DB02202,DB02890,DB02957,DB03668,DB03718, |

|          |              |     |     |     |                                                                                                        |                                                                                                                                                  |
|----------|--------------|-----|-----|-----|--------------------------------------------------------------------------------------------------------|--------------------------------------------------------------------------------------------------------------------------------------------------|
| 4.2.1.80 | R_OMPHHX     | no  | no  | no  | b2907                                                                                                  | -                                                                                                                                                |
|          | R_OP4ENH     | no  | no  | no  | b0350                                                                                                  | -                                                                                                                                                |
|          | R_OPHHX      | yes | no  | no  | b3835                                                                                                  | -                                                                                                                                                |
|          | R_ORNabcpp   | no  | no  | no  | ( b2310 and b2307<br>and b2306 and<br>b2308 )                                                          | -                                                                                                                                                |
| 2.4.2.10 | R_OROTt2_2pp | no  | no  | no  | b3528                                                                                                  | -                                                                                                                                                |
| 4.1.1.71 | R_ORPT       | no  | yes | yes | b3642                                                                                                  | DB01632,                                                                                                                                         |
| 1.5.1.12 | R_OXGDC2     | no  | no  | no  | b2264                                                                                                  | -                                                                                                                                                |
| 1.5.1.2  | R_P5CD       | no  | no  | no  | b1014                                                                                                  | DB03051,DB04184,                                                                                                                                 |
|          | R_P5CR       | no  | yes | no  | b0386                                                                                                  | -                                                                                                                                                |
|          | R_PA120abcpp | yes | no  | yes | b0914                                                                                                  | -                                                                                                                                                |
|          | R_PA140abcpp | yes | no  | yes | b0914                                                                                                  | -                                                                                                                                                |
|          | R_PA141abcpp | yes | no  | yes | b0914                                                                                                  | -                                                                                                                                                |
|          | R_PA160abcpp | yes | no  | yes | b0914                                                                                                  | -                                                                                                                                                |
|          | R_PA161abcpp | yes | no  | yes | b0914                                                                                                  | -                                                                                                                                                |
|          | R_PA180abcpp | yes | no  | yes | b0914                                                                                                  | -                                                                                                                                                |
|          | R_PA181abcpp | yes | no  | yes | b0914                                                                                                  | -                                                                                                                                                |
| 6.2.1.30 | R_PACCOAL    | no  | no  | no  | b1398                                                                                                  | -                                                                                                                                                |
| 6.3.2.1  | R_PANTS      | no  | yes | yes | b0133                                                                                                  | DB02596,                                                                                                                                         |
| 3.1.3.4  | R_PAPA120    | no  | no  | no  | b1278                                                                                                  | -                                                                                                                                                |
| 3.1.3.4  | R_PAPA120pp  | no  | no  | no  | b1278                                                                                                  | -                                                                                                                                                |
| 3.1.3.4  | R_PAPA140    | no  | no  | no  | b1278                                                                                                  | -                                                                                                                                                |
| 3.1.3.4  | R_PAPA140pp  | no  | no  | no  | b1278                                                                                                  | -                                                                                                                                                |
| 3.1.3.4  | R_PAPA141    | no  | no  | no  | b1278                                                                                                  | -                                                                                                                                                |
| 3.1.3.4  | R_PAPA141pp  | no  | no  | no  | b1278                                                                                                  | -                                                                                                                                                |
| 3.1.3.4  | R_PAPA160    | no  | no  | no  | b1278                                                                                                  | -                                                                                                                                                |
| 3.1.3.4  | R_PAPA160pp  | no  | no  | no  | b1278                                                                                                  | -                                                                                                                                                |
| 3.1.3.4  | R_PAPA161    | no  | no  | no  | b1278                                                                                                  | -                                                                                                                                                |
| 3.1.3.4  | R_PAPA161pp  | no  | no  | no  | b1278                                                                                                  | -                                                                                                                                                |
| 3.1.3.4  | R_PAPA180    | no  | no  | no  | b1278                                                                                                  | -                                                                                                                                                |
| 3.1.3.4  | R_PAPA180pp  | no  | no  | no  | b1278                                                                                                  | -                                                                                                                                                |
| 3.1.3.4  | R_PAPA181    | no  | no  | no  | b1278                                                                                                  | -                                                                                                                                                |
| 3.1.3.4  | R_PAPA181pp  | no  | no  | no  | b1278                                                                                                  | -                                                                                                                                                |
| 2.7.8.13 | R_PAPPT3     | yes | yes | yes | b0087                                                                                                  | -                                                                                                                                                |
| 1.8.4.8  | R_PAPSR      | no  | no  | no  | (( b2762 and b2582 ) -<br>or ( b2762 and<br>b3781 ) )                                                  | -                                                                                                                                                |
| 1.8.4.8  | R_PAPSR2     | no  | no  | no  | (( b2762 and b0849 ) -<br>or ( b2762 and<br>b1064 ) or ( b2762<br>and b1654 ) or ( b2762 and b3610 ) ) | -                                                                                                                                                |
| 3.1.4.17 | R_PDE1       | no  | no  | no  | b1489                                                                                                  | DB01640,DB01647,DB01791,DB01954,DB01959,DB01970,DB02660,DB02676,DB02918,DB03183,DB03349,DB03606,DB03807,DB03849,DB04149,DB04271,DB04469,DB04530, |
|          | R_PDH        | no  | no  | no  | ( b0114 and b0115<br>and b0116 )                                                                       | -                                                                                                                                                |
| 1.4.3.5  | R_PDX5POi    | no  | no  | no  | b1638                                                                                                  | -                                                                                                                                                |
|          | R_PDX5PS     | no  | yes | no  | ( b0052 and b2564 )                                                                                    | -                                                                                                                                                |
|          | R_PE120abcpp | yes | no  | yes | b0914                                                                                                  | -                                                                                                                                                |
|          | R_PE140abcpp | yes | no  | yes | b0914                                                                                                  | -                                                                                                                                                |
|          | R_PE141abcpp | yes | no  | yes | b0914                                                                                                  | -                                                                                                                                                |
|          | R_PE160abcpp | yes | yes | yes | b0914                                                                                                  | -                                                                                                                                                |
|          | R_PE161abcpp | yes | yes | yes | b0914                                                                                                  | -                                                                                                                                                |
|          | R_PE180abcpp | yes | no  | yes | b0914                                                                                                  | -                                                                                                                                                |
|          | R_PE181abcpp | yes | no  | yes | b0914                                                                                                  | -                                                                                                                                                |

|          |                |     |     |     |                                         |                                                          |
|----------|----------------|-----|-----|-----|-----------------------------------------|----------------------------------------------------------|
| 1.4.3.6  | R_PEAMNOpp     | no  | no  | no  | b1386                                   | DB01634,DB01657,DB02511,DB02537,DB02928,DB03631,DB04334, |
|          | R_PERD         | no  | yes | no  | b2320                                   | -                                                        |
|          | R_PETNT161pp   | no  | no  | no  | b3546                                   | -                                                        |
|          | R_PETNT181pp   | no  | no  | no  | b3546                                   | -                                                        |
| 2.7.1.11 | R_PFK_2        | no  | no  | no  | b3916                                   | DB04493,                                                 |
|          | R_PG120abcpp   | yes | no  | yes | b0914                                   | -                                                        |
|          | R_PG140abcpp   | yes | no  | yes | b0914                                   | -                                                        |
|          | R_PG141abcpp   | yes | no  | yes | b0914                                   | -                                                        |
|          | R_PG160abcpp   | yes | no  | yes | b0914                                   | -                                                        |
|          | R_PG161abcpp   | yes | no  | yes | b0914                                   | -                                                        |
|          | R_PG180abcpp   | yes | no  | yes | b0914                                   | -                                                        |
|          | R_PG181abcpp   | yes | no  | yes | b0914                                   | -                                                        |
| 5.4.2.10 | R_PGAMT        | no  | yes | no  | b3176                                   | -                                                        |
| 1.1.1.95 | R_PGCD         | no  | no  | no  | b2913                                   | DB03806,                                                 |
| 5.3.1.9  | R_PGI          | no  | no  | no  | b4025                                   | DB02093,DB02171,DB02257,DB03042,DB03937,DB04493,         |
| 2.7.2.3  | R_PGK          | yes | no  | no  | b2926                                   | -                                                        |
| 3.1.1.31 | R_PGL          | no  | no  | no  | b0767                                   | DB03754,                                                 |
| 3.1.3.18 | R_PGLYCP       | no  | no  | no  | b3385                                   | DB04184,                                                 |
|          | R_PGP120abcpp  | yes | no  | yes | b0914                                   | -                                                        |
|          | R_PGP140abcpp  | yes | no  | yes | b0914                                   | -                                                        |
|          | R_PGP141abcpp  | yes | no  | yes | b0914                                   | -                                                        |
|          | R_PGP160abcpp  | yes | no  | yes | b0914                                   | -                                                        |
|          | R_PGP161abcpp  | yes | no  | yes | b0914                                   | -                                                        |
|          | R_PGP180abcpp  | yes | no  | yes | b0914                                   | -                                                        |
|          | R_PGP181abcpp  | yes | no  | yes | b0914                                   | -                                                        |
| 2.7.8.5  | R_PGSA120      | yes | no  | yes | b1912                                   | -                                                        |
| 2.7.8.5  | R_PGSA140      | yes | no  | yes | b1912                                   | -                                                        |
| 2.7.8.5  | R_PGSA141      | yes | no  | yes | b1912                                   | -                                                        |
| 2.7.8.5  | R_PGSA160      | yes | no  | yes | b1912                                   | -                                                        |
| 2.7.8.5  | R_PGSA161      | yes | no  | yes | b1912                                   | -                                                        |
| 2.7.8.5  | R_PGSA180      | yes | no  | yes | b1912                                   | -                                                        |
| 2.7.8.5  | R_PGSA181      | yes | no  | yes | b1912                                   | -                                                        |
|          | R_PHEMEabcpp   | no  | no  | no  | ( b2201 and b2200 and b2199 )           | -                                                        |
| 6.1.1.20 | R_PHETRS       | yes | no  | yes | ( b1713 and b1714 )                     | -                                                        |
|          | R_PHYTSpp      | no  | no  | no  | b0980                                   | -                                                        |
|          | R_Pluabcpp     | no  | no  | no  | ( b3726 and b3725 and b3727 and b3728 ) | -                                                        |
| 3.1.1.32 | R_PLIPA1A120pp | no  | no  | no  | b3821                                   | DB03122,DB03692,                                         |
| 3.1.1.32 | R_PLIPA1A140pp | no  | no  | no  | b3821                                   | DB03122,DB03692,                                         |
| 3.1.1.32 | R_PLIPA1A141pp | no  | no  | no  | b3821                                   | DB03122,DB03692,                                         |
| 3.1.1.32 | R_PLIPA1A160pp | no  | no  | no  | b3821                                   | DB03122,DB03692,                                         |
| 3.1.1.32 | R_PLIPA1A161pp | no  | no  | no  | b3821                                   | DB03122,DB03692,                                         |
| 3.1.1.32 | R_PLIPA1A180pp | no  | no  | no  | b3821                                   | DB03122,DB03692,                                         |
| 3.1.1.32 | R_PLIPA1A181pp | no  | no  | no  | b3821                                   | DB03122,DB03692,                                         |
| 3.1.1.32 | R_PLIPA1E120pp | no  | no  | no  | b3821                                   | DB03122,DB03692,                                         |
| 3.1.1.32 | R_PLIPA1E140pp | no  | no  | no  | b3821                                   | DB03122,DB03692,                                         |
| 3.1.1.32 | R_PLIPA1E141pp | no  | no  | no  | b3821                                   | DB03122,DB03692,                                         |
| 3.1.1.32 | R_PLIPA1E160pp | no  | no  | no  | b3821                                   | DB03122,DB03692,                                         |
| 3.1.1.32 | R_PLIPA1E161pp | no  | no  | no  | b3821                                   | DB03122,DB03692,                                         |
| 3.1.1.32 | R_PLIPA1E180pp | no  | no  | no  | b3821                                   | DB03122,DB03692,                                         |
| 3.1.1.32 | R_PLIPA1E181pp | no  | no  | no  | b3821                                   | DB03122,DB03692,                                         |
| 3.1.1.32 | R_PLIPA1G120pp | no  | no  | no  | b3821                                   | DB03122,DB03692,                                         |
| 3.1.1.32 | R_PLIPA1G140pp | no  | no  | no  | b3821                                   | DB03122,DB03692,                                         |
| 3.1.1.32 | R_PLIPA1G141pp | no  | no  | no  | b3821                                   | DB03122,DB03692,                                         |
| 3.1.1.32 | R_PLIPA1G160pp | no  | no  | no  | b3821                                   | DB03122,DB03692,                                         |
| 3.1.1.32 | R_PLIPA1G161pp | no  | no  | no  | b3821                                   | DB03122,DB03692,                                         |
| 3.1.1.32 | R_PLIPA1G180pp | no  | no  | no  | b3821                                   | DB03122,DB03692,                                         |



|          |                |    |    |    |       |                                                                                                                                                                                                  |
|----------|----------------|----|----|----|-------|--------------------------------------------------------------------------------------------------------------------------------------------------------------------------------------------------|
| 3.1.1.32 | R_PLIPA1G181pp | no | no | no | b3821 | DB03122,DB03692,                                                                                                                                                                                 |
| 3.1.1.4  | R_PLIPA2A120pp | no | no | no | b3821 | DB00233,DB01103,DB01955,DB02210,DB02448,DB02504,DB02636,DB02936,DB02938,DB03121,DB03122,DB03471,DB03565,DB03585,DB03587,DB03633,DB03692,DB03784,DB04077,DB04112,DB04184,DB04287,DB04402,DB04743, |
| 3.1.1.4  | R_PLIPA2A140pp | no | no | no | b3821 | DB00233,DB01103,DB01955,DB02210,DB02448,DB02504,DB02636,DB02936,DB02938,DB03121,DB03122,DB03471,DB03565,DB03585,DB03587,DB03633,DB03692,DB03784,DB04077,DB04112,DB04184,DB04287,DB04402,DB04743, |
| 3.1.1.4  | R_PLIPA2A141pp | no | no | no | b3821 | DB00233,DB01103,DB01955,DB02210,DB02448,DB02504,DB02636,DB02936,DB02938,DB03121,DB03122,DB03471,DB03565,DB03585,DB03587,DB03633,DB03692,DB03784,DB04077,DB04112,DB04184,DB04287,DB04402,DB04743, |
| 3.1.1.4  | R_PLIPA2A160pp | no | no | no | b3821 | DB00233,DB01103,DB01955,DB02210,DB02448,DB02504,DB02636,DB02936,DB02938,DB03121,DB03122,DB03471,DB03565,DB03585,DB03587,DB03633,DB03692,DB03784,DB04077,DB04112,DB04184,DB04287,DB04402,DB04743, |
| 3.1.1.4  | R_PLIPA2A161pp | no | no | no | b3821 | DB00233,DB01103,DB01955,DB02210,DB02448,DB02504,DB02636,DB02936,DB02938,DB03121,DB03122,DB03471,DB03565,DB03585,DB03587,DB03633,DB03692,DB03784,DB04077,DB04112,DB04184,DB04287,DB04402,DB04743, |
| 3.1.1.4  | R_PLIPA2A180pp | no | no | no | b3821 | DB00233,DB01103,DB01955,DB02210,DB02448,DB02504,DB02636,DB02936,DB02938,DB03121,DB03122,DB03471,DB03565,DB03585,DB03587,DB03633,DB03692,DB03784,DB04077,DB04112,DB04184,DB04287,DB04402,DB04743, |
| 3.1.1.4  | R_PLIPA2A181pp | no | no | no | b3821 | DB00233,DB01103,DB01955,DB02210,DB02448,DB02504,DB02636,DB02936,DB02938,DB03121,DB03122,DB03471,DB03565,DB03585,DB03587,DB03633,DB03692,DB03784,DB04077,DB04112,DB04184,DB04287,DB04402,DB04743, |

|         |                |    |    |    |       |                                                                                                                                                                                                  |
|---------|----------------|----|----|----|-------|--------------------------------------------------------------------------------------------------------------------------------------------------------------------------------------------------|
| 3.1.1.4 | R_PLIPA2E120pp | no | no | no | b3821 | DB00233,DB01103,DB01955,DB02210,DB02448,DB02504,DB02636,DB02936,DB02938,DB03121,DB03122,DB03471,DB03565,DB03585,DB03587,DB03633,DB03692,DB03784,DB04077,DB04112,DB04184,DB04287,DB04402,DB04743, |
| 3.1.1.4 | R_PLIPA2E140pp | no | no | no | b3821 | DB00233,DB01103,DB01955,DB02210,DB02448,DB02504,DB02636,DB02936,DB02938,DB03121,DB03122,DB03471,DB03565,DB03585,DB03587,DB03633,DB03692,DB03784,DB04077,DB04112,DB04184,DB04287,DB04402,DB04743, |
| 3.1.1.4 | R_PLIPA2E141pp | no | no | no | b3821 | DB00233,DB01103,DB01955,DB02210,DB02448,DB02504,DB02636,DB02936,DB02938,DB03121,DB03122,DB03471,DB03565,DB03585,DB03587,DB03633,DB03692,DB03784,DB04077,DB04112,DB04184,DB04287,DB04402,DB04743, |
| 3.1.1.4 | R_PLIPA2E160pp | no | no | no | b3821 | DB00233,DB01103,DB01955,DB02210,DB02448,DB02504,DB02636,DB02936,DB02938,DB03121,DB03122,DB03471,DB03565,DB03585,DB03587,DB03633,DB03692,DB03784,DB04077,DB04112,DB04184,DB04287,DB04402,DB04743, |
| 3.1.1.4 | R_PLIPA2E161pp | no | no | no | b3821 | DB00233,DB01103,DB01955,DB02210,DB02448,DB02504,DB02636,DB02936,DB02938,DB03121,DB03122,DB03471,DB03565,DB03585,DB03587,DB03633,DB03692,DB03784,DB04077,DB04112,DB04184,DB04287,DB04402,DB04743, |
| 3.1.1.4 | R_PLIPA2E180pp | no | no | no | b3821 | DB00233,DB01103,DB01955,DB02210,DB02448,DB02504,DB02636,DB02936,DB02938,DB03121,DB03122,DB03471,DB03565,DB03585,DB03587,DB03633,DB03692,DB03784,DB04077,DB04112,DB04184,DB04287,DB04402,DB04743, |
| 3.1.1.4 | R_PLIPA2E181pp | no | no | no | b3821 | DB00233,DB01103,DB01955,DB02210,DB02448,DB02504,DB02636,DB02936,DB02938,DB03121,DB03122,DB03471,DB03565,DB03585,DB03587,DB03633,DB03692,DB03784,DB04077,DB04112,DB04184,DB04287,DB04402,DB04743, |

|          |                        |    |     |    |       |                                                                                                                                                                                                  |
|----------|------------------------|----|-----|----|-------|--------------------------------------------------------------------------------------------------------------------------------------------------------------------------------------------------|
| 3.1.1.4  | R_PLIPA2G120pp         | no | no  | no | b3821 | DB00233,DB01103,DB01955,DB02210,DB02448,DB02504,DB02636,DB02936,DB02938,DB03121,DB03122,DB03471,DB03565,DB03585,DB03587,DB03633,DB03692,DB03784,DB04077,DB04112,DB04184,DB04287,DB04402,DB04743, |
| 3.1.1.4  | R_PLIPA2G140pp         | no | no  | no | b3821 | DB00233,DB01103,DB01955,DB02210,DB02448,DB02504,DB02636,DB02936,DB02938,DB03121,DB03122,DB03471,DB03565,DB03585,DB03587,DB03633,DB03692,DB03784,DB04077,DB04112,DB04184,DB04287,DB04402,DB04743, |
| 3.1.1.4  | R_PLIPA2G141pp         | no | no  | no | b3821 | DB00233,DB01103,DB01955,DB02210,DB02448,DB02504,DB02636,DB02936,DB02938,DB03121,DB03122,DB03471,DB03565,DB03585,DB03587,DB03633,DB03692,DB03784,DB04077,DB04112,DB04184,DB04287,DB04402,DB04743, |
| 3.1.1.4  | R_PLIPA2G160pp         | no | no  | no | b3821 | DB00233,DB01103,DB01955,DB02210,DB02448,DB02504,DB02636,DB02936,DB02938,DB03121,DB03122,DB03471,DB03565,DB03585,DB03587,DB03633,DB03692,DB03784,DB04077,DB04112,DB04184,DB04287,DB04402,DB04743, |
| 3.1.1.4  | R_PLIPA2G161pp         | no | no  | no | b3821 | DB00233,DB01103,DB01955,DB02210,DB02448,DB02504,DB02636,DB02936,DB02938,DB03121,DB03122,DB03471,DB03565,DB03585,DB03587,DB03633,DB03692,DB03784,DB04077,DB04112,DB04184,DB04287,DB04402,DB04743, |
| 3.1.1.4  | R_PLIPA2G180pp         | no | no  | no | b3821 | DB00233,DB01103,DB01955,DB02210,DB02448,DB02504,DB02636,DB02936,DB02938,DB03121,DB03122,DB03471,DB03565,DB03585,DB03587,DB03633,DB03692,DB03784,DB04077,DB04112,DB04184,DB04287,DB04402,DB04743, |
| 3.1.1.4  | R_PLIPA2G181pp         | no | no  | no | b3821 | DB00233,DB01103,DB01955,DB02210,DB02448,DB02504,DB02636,DB02936,DB02938,DB03121,DB03122,DB03471,DB03565,DB03585,DB03587,DB03633,DB03692,DB03784,DB04077,DB04112,DB04184,DB04287,DB04402,DB04743, |
| 5.4.2.8  | R_PMANM                | no | no  | no | b2048 | DB04522,                                                                                                                                                                                         |
| 2.7.4.7  | R_PMPK                 | no | yes | no | b2103 | -                                                                                                                                                                                                |
| 2.7.1.33 | R_PNTK                 | no | yes | no | b3974 | DB01783,                                                                                                                                                                                         |
|          | R_PNTOt4pp             | no | no  | no | b3258 | -                                                                                                                                                                                                |
| 1.2.2.2  | R_POX                  | no | no  | no | b0871 | DB00336,                                                                                                                                                                                         |
| 2.7.2.1  | R_PPAK <sub>r</sub>    | no | no  | no | b3115 | DB02423,                                                                                                                                                                                         |
|          | R_PPA <sub>t</sub> 4pp | no | no  | no | b1015 | -                                                                                                                                                                                                |

|          |               |     |     |     |                                                   |                                                                  |
|----------|---------------|-----|-----|-----|---------------------------------------------------|------------------------------------------------------------------|
| 4.2.1.24 | R_PPBNGS      | yes | yes | no  | b0369                                             | DB02068,DB02239,DB02260,DB02828,DB02878,DB04344,DB04530,DB04560, |
| 4.1.1.31 | R_PPC         | no  | yes | no  | b3956                                             | DB04317,                                                         |
| 4.1.1.36 | R_PPDC        | yes | yes | no  | b3639                                             | -                                                                |
| 4.1.1.49 | R_PPCK        | no  | no  | no  | b3403                                             | DB04184,                                                         |
|          | R_PPCSCT      | no  | no  | no  | b2920                                             | -                                                                |
| 3.1.7.2  | R_PPGPPDP     | yes | no  | no  | b3650                                             | -                                                                |
| 2.7.4.1  | R_PPK2r       | no  | no  | no  | b2501                                             | -                                                                |
| 2.7.4.1  | R_PPKr        | no  | no  | yes | b2501                                             | -                                                                |
| 5.4.2.7  | R_PPM2        | no  | no  | no  | b4383                                             | -                                                                |
| 6.3.2.5  | R_PPCL2       | yes | yes | no  | b3639                                             | -                                                                |
| 1.3.1.12 | R_PPND        | no  | yes | no  | b2600                                             | -                                                                |
| 4.2.1.51 | R_PPNDH       | no  | yes | no  | b2599                                             | -                                                                |
| 1.3.3.4  | R_PPPGO       | yes | no  | no  | b3850                                             | DB03272,                                                         |
| 1.3.3.4  | R_PPPGO3      | yes | no  | no  | b3850                                             | DB03272,                                                         |
|          | R_PPPNDO      | no  | no  | no  | ( b2538 and b2539 and b2540 and b2542 )           | -                                                                |
|          | R_PPPNt2rpp   | no  | no  | no  | b2536                                             | -                                                                |
| 2.7.9.2  | R_PPS         | no  | no  | no  | b1702                                             | -                                                                |
|          | R_PPTHpp      | no  | no  | no  | b0383                                             | -                                                                |
| 6.3.4.13 | R_PRAGSr      | no  | yes | no  | b4005                                             | DB03546,                                                         |
| 5.3.1.24 | R_PRAli       | no  | yes | no  | b1262                                             | DB03543,                                                         |
| 6.3.3.1  | R_PRAIS       | no  | yes | no  | b2499                                             | DB03546,                                                         |
| 3.5.4.19 | R_PRAMPC      | no  | yes | no  | b2026                                             | -                                                                |
| 6.3.2.6  | R_PRASCSi     | no  | yes | no  | b2476                                             | -                                                                |
| 3.6.1.31 | R_PRATPP      | no  | yes | no  | b2026                                             | -                                                                |
| 6.3.5.3  | R_PRFGS       | no  | yes | no  | b2557                                             | -                                                                |
| 5.3.1.16 | R_PRMICI      | no  | yes | no  | b2024                                             | -                                                                |
|          | R_PROabcpp    | no  | no  | no  | ( b2677 and b2678 and b2679 )                     | -                                                                |
| 1.5.99.8 | R_PROD2       | no  | no  | no  | b1014                                             | DB03051,DB04184,                                                 |
|          | R_PROGLYabcpp | no  | no  | no  | ( b3544 and b3543 and b3542 and b3541 and b3540 ) | -                                                                |
|          | R_PROt2rpp    | no  | no  | no  | b4111                                             | -                                                                |
|          | R_PROt4pp     | no  | no  | no  | b1015                                             | -                                                                |
| 6.1.1.15 | R_PROTRS      | yes | no  | yes | b0194                                             | DB02510,DB03376,                                                 |
| 2.7.6.1  | R_PRPPS       | yes | no  | no  | b1207                                             | DB02798,DB03148,                                                 |
|          | R_PSCLYSt2pp  | no  | no  | no  | b3370                                             | -                                                                |
| 2.5.1.19 | R_PSCVT       | no  | yes | yes | b0908                                             | DB02592,DB03116,                                                 |
| 4.1.1.65 | R_PSD120      | yes | no  | yes | b4160                                             | -                                                                |
| 4.1.1.65 | R_PSD140      | yes | no  | yes | b4160                                             | -                                                                |
| 4.1.1.65 | R_PSD141      | yes | no  | yes | b4160                                             | -                                                                |
| 4.1.1.65 | R_PSD160      | yes | yes | yes | b4160                                             | -                                                                |
| 4.1.1.65 | R_PSD161      | yes | yes | yes | b4160                                             | -                                                                |
| 4.1.1.65 | R_PSD180      | yes | no  | yes | b4160                                             | -                                                                |
| 4.1.1.65 | R_PSD181      | yes | no  | yes | b4160                                             | -                                                                |
| 2.6.1.52 | R_PSERT       | no  | no  | no  | b0907                                             | DB02327,                                                         |
| 3.1.3.3  | R_PSP_L       | no  | no  | no  | b4388                                             | DB03292,DB04156,DB04444,DB04522,                                 |
|          | R_PSP_Lpp     | no  | no  | no  | b4055                                             | -                                                                |
| 2.7.8.8  | R_PSSA120     | yes | no  | yes | b2585                                             | -                                                                |
| 2.7.8.8  | R_PSSA140     | yes | no  | yes | b2585                                             | -                                                                |
| 2.7.8.8  | R_PSSA141     | yes | no  | yes | b2585                                             | -                                                                |
| 2.7.8.8  | R_PSSA160     | yes | yes | yes | b2585                                             | -                                                                |
| 2.7.8.8  | R_PSSA161     | yes | yes | yes | b2585                                             | -                                                                |
| 2.7.8.8  | R_PSSA180     | yes | no  | yes | b2585                                             | -                                                                |
| 2.7.8.8  | R_PSSA181     | yes | no  | yes | b2585                                             | -                                                                |
|          | R_PTA2        | no  | no  | no  | b2297                                             | -                                                                |
|          | R_PTHRpp      | no  | no  | no  | b4055                                             | -                                                                |
| 2.7.7.3  | R_PTPATi      | yes | yes | yes | b3634                                             | -                                                                |

|          |               |     |     |     |       |                                                                                                                                                                                                                                                          |
|----------|---------------|-----|-----|-----|-------|----------------------------------------------------------------------------------------------------------------------------------------------------------------------------------------------------------------------------------------------------------|
|          | R_PTRCORNT7pp | no  | no  | no  | b0692 | -                                                                                                                                                                                                                                                        |
| 2.6.1.29 | R_PTRCTA      | no  | no  | no  | b3073 | -                                                                                                                                                                                                                                                        |
| 2.4.2.1  | R_PUNP1       | no  | no  | no  | b4384 | DB00194,DB00787,DB01667,DB02066,DB02113,DB02222,DB02230,DB02391,DB02392,DB02568,DB02796,DB02896,DB02934,DB02947,DB02985,DB03172,DB03411,DB03528,DB03551,DB03609,DB03735,DB03743,DB03952,DB03986,DB04095,DB04198,DB04260,DB04441,DB04753,DB04754,DB04757, |
| 2.4.2.1  | R_PUNP2       | no  | no  | no  | b4384 | DB00194,DB00787,DB01667,DB02066,DB02113,DB02222,DB02230,DB02391,DB02392,DB02568,DB02796,DB02896,DB02934,DB02947,DB02985,DB03172,DB03411,DB03528,DB03551,DB03609,DB03735,DB03743,DB03952,DB03986,DB04095,DB04198,DB04260,DB04441,DB04753,DB04754,DB04757, |
| 2.4.2.1  | R_PUNP7       | no  | no  | no  | b2407 | DB00194,DB00787,DB01667,DB02066,DB02113,DB02222,DB02230,DB02391,DB02392,DB02568,DB02796,DB02896,DB02934,DB02947,DB02985,DB03172,DB03411,DB03528,DB03551,DB03609,DB03735,DB03743,DB03952,DB03986,DB04095,DB04198,DB04260,DB04441,DB04753,DB04754,DB04757, |
| 1.4.3.5  | R_PYAM5PO     | no  | no  | no  | b1638 | -                                                                                                                                                                                                                                                        |
| 2.7.1.35 | R_PYDAMK      | no  | no  | no  | b2418 | DB04770,DB04776,                                                                                                                                                                                                                                         |
| 2.7.1.35 | R_PYDXNK      | no  | no  | no  | b2418 | DB04770,DB04776,                                                                                                                                                                                                                                         |
| 2.4.2.2  | R_PYNP2r      | no  | no  | no  | b3831 | -                                                                                                                                                                                                                                                        |
|          | R_QMO2        | no  | no  | no  | b3029 | -                                                                                                                                                                                                                                                        |
|          | R_QMO3        | no  | no  | no  | b3029 | -                                                                                                                                                                                                                                                        |
|          | R_QULNS       | no  | yes | no  | b0750 | -                                                                                                                                                                                                                                                        |
|          | R_R15BPK      | no  | no  | no  | b4094 | -                                                                                                                                                                                                                                                        |
|          | R_R5PP        | no  | no  | no  | b0822 | -                                                                                                                                                                                                                                                        |
|          | R_R5PPpp      | no  | no  | no  | b4055 | -                                                                                                                                                                                                                                                        |
| 2.7.1.26 | R_RBFK        | yes | yes | yes | b0025 | -                                                                                                                                                                                                                                                        |
| 2.5.1.9  | R_RBFSa       | yes | yes | no  | b1662 | DB02135,DB02184,DB02214,DB02290,DB02693,DB02711,DB03022,DB03812,DB03883,DB03973,DB04128,DB04162,DB04262,DB04266,                                                                                                                                         |
| 2.5.1.9  | R_RBFSb       | yes | yes | no  | b0415 | DB02135,DB02184,DB02214,DB02290,DB02693,DB02711,DB03022,DB03812,DB03883,DB03973,DB04128,DB04162,DB04262,DB04266,                                                                                                                                         |
| 2.7.1.15 | R_RBK         | no  | no  | no  | b3752 | DB01936,DB04444,                                                                                                                                                                                                                                         |
| 2.7.1.16 | R_RBK_L1      | no  | no  | no  | b0063 | -                                                                                                                                                                                                                                                        |
|          | R_RHAT1       | no  | no  | no  | b3629 | -                                                                                                                                                                                                                                                        |
|          | R_RHCCE       | no  | yes | no  | b2687 | -                                                                                                                                                                                                                                                        |
| 5.3.1.14 | R_RMI         | no  | no  | no  | b3903 | -                                                                                                                                                                                                                                                        |
| 2.7.1.5  | R_RMK         | no  | no  | no  | b3904 | -                                                                                                                                                                                                                                                        |
|          | R_RMNtpp      | no  | no  | no  | b3907 | -                                                                                                                                                                                                                                                        |
| 4.1.2.19 | R_RMPA        | no  | no  | no  | b3902 | DB03026,                                                                                                                                                                                                                                                 |

|          |          |     |    |     |                                                                                                                                                                       |
|----------|----------|-----|----|-----|-----------------------------------------------------------------------------------------------------------------------------------------------------------------------|
| 1.17.4.1 | R_RNDR1  | yes | no | yes | (( ( b2234 and b2235 DB02452,DB04077,<br>) and b3781 ) or ((<br>b2234 and b2235 )<br>and b2582 ) )                                                                    |
|          | R_RNDR1b | no  | no | no  | (( b1654 and ( b2675 -<br>and b2676 )) or (<br>b0849 and ( b2675<br>and b2676 )) or (<br>b1064 and ( b2675<br>and b2676 )) or (<br>b3610 and ( b2675<br>and b2676 ))) |
| 1.17.4.1 | R_RNDR2  | yes | no | yes | (( ( b2234 and b2235 DB02452,DB04077,<br>) and b2582 ) or ((<br>b2234 and b2235 )<br>and b3781 ) )                                                                    |
|          | R_RNDR2b | no  | no | no  | (( b3610 and ( b2675 -<br>and b2676 )) or (<br>b1064 and ( b2675<br>and b2676 )) or (<br>b1654 and ( b2675<br>and b2676 )) or (<br>b0849 and ( b2675<br>and b2676 ))) |
| 1.17.4.1 | R_RNDR3  | yes | no | yes | (( ( b2234 and b2235 DB02452,DB04077,<br>) and b2582 ) or ((<br>b2234 and b2235 )<br>and b3781 ) )                                                                    |
|          | R_RNDR3b | no  | no | no  | (( b1654 and ( b2675 -<br>and b2676 )) or (<br>b1064 and ( b2675<br>and b2676 )) or (<br>b0849 and ( b2675<br>and b2676 )) or (<br>b3610 and ( b2675<br>and b2676 ))) |
| 1.17.4.1 | R_RNDR4  | yes | no | yes | (( ( b2234 and b2235 DB02452,DB04077,<br>) and b2582 ) or ((<br>b2234 and b2235 )<br>and b3781 ) )                                                                    |
|          | R_RNDR4b | no  | no | no  | (( b1064 and ( b2675 -<br>and b2676 )) or (<br>b3610 and ( b2675<br>and b2676 )) or (<br>b1654 and ( b2675<br>and b2676 )) or (<br>b0849 and ( b2675<br>and b2676 ))) |

|           |            |     |     |     |                                                                                                                                                            |                          |
|-----------|------------|-----|-----|-----|------------------------------------------------------------------------------------------------------------------------------------------------------------|--------------------------|
|           | R_RNTR1c   | no  | no  | no  | (( b2895 and b3924 -<br>and b4238 and<br>b4237 ) or ( b2895<br>and b4238 ) or ( b0684 and b4238 )<br>or ( b0684 and<br>b3924 and b4238<br>and b4237 ) )    |                          |
|           | R_RNTR2c   | no  | no  | no  | (( b0684 and b4238 ) -<br>or ( b2895 and<br>b4238 ) or ( b2895<br>and b3924 and<br>b4238 and b4237 )<br>or ( b0684 and<br>b3924 and b4238<br>and b4237 ) ) |                          |
|           | R_RNTR3c   | no  | no  | no  | (( b2895 and b4238 ) -<br>or ( b0684 and<br>b3924 and b4238<br>and b4237 ) or ( b0684 and b4238 )<br>or ( b2895 and<br>b3924 and b4238<br>and b4237 ) )    |                          |
|           | R_RNTR4c   | no  | no  | no  | (( b0684 and b3924 -<br>and b4238 and<br>b4237 ) or ( b2895<br>and b4238 ) or ( b0684 and b4238 )<br>or ( b2895 and<br>b3924 and b4238<br>and b4237 ) )    |                          |
|           | R_RZ5PP    | no  | no  | no  | b0638                                                                                                                                                      | -                        |
| 2.6.1.69  | R_S7PI     | no  | no  | no  | b0222                                                                                                                                                      | -                        |
|           | R_SADH     | no  | no  | no  | b1745                                                                                                                                                      | -                        |
|           | R_SADT2    | no  | yes | no  | ( b2751 and b2752 )                                                                                                                                        | -                        |
| 1.5.3.1   | R_SARCOX   | no  | no  | no  | b1059                                                                                                                                                      | DB01918,DB03098,DB03517, |
| 1.1.1.140 | R_SBTDP    | no  | no  | no  | b2705                                                                                                                                                      | -                        |
|           | R_SBTptspp | no  | no  | no  | ( b2415 and b2416<br>and b2702 and<br>b2704 and b2703 )                                                                                                    | -                        |
| 3.5.1.18  | R_SDPDS    | yes | yes | yes | b2472                                                                                                                                                      | -                        |
| 2.6.1.17  | R_SDPTA    | no  | yes | no  | b3359                                                                                                                                                      | -                        |
| 2.9.1.1   | R_SELGYSS  | no  | no  | no  | b3591                                                                                                                                                      | -                        |
| 2.7.9.3   | R_SELNPS   | no  | no  | no  | b1764                                                                                                                                                      | -                        |
|           | R_SERASr   | no  | no  | no  | b0586                                                                                                                                                      | -                        |
| 2.3.1.30  | R_SERAT    | no  | yes | no  | b3607                                                                                                                                                      | -                        |
|           | R_SERD_D   | no  | no  | no  | b2366                                                                                                                                                      | -                        |
|           | R_SERt4pp  | no  | no  | no  | b3089                                                                                                                                                      | -                        |
| 6.1.1.11  | R_SERTRS   | yes | no  | yes | b0893                                                                                                                                                      | -                        |
| 6.1.1.11  | R_SERTRS2  | yes | no  | yes | b0893                                                                                                                                                      | -                        |
|           | R_SGDS     | no  | no  | no  | b1744                                                                                                                                                      | -                        |
|           | R_SGSAD    | no  | no  | no  | b1746                                                                                                                                                      | -                        |
|           | R_SHCHCS2  | no  | no  | no  | b2264                                                                                                                                                      | -                        |
|           | R_SHCHD2   | no  | yes | no  | b3368                                                                                                                                                      | -                        |
|           | R_SHCHF    | no  | yes | yes | b3368                                                                                                                                                      | -                        |
| 4.2.99.9  | R_SHSL1    | no  | yes | yes | b3939                                                                                                                                                      | -                        |
|           | R_SKMt2pp  | no  | no  | no  | b1981                                                                                                                                                      | -                        |

|            |               |     |     |     |                                                   |                                                  |
|------------|---------------|-----|-----|-----|---------------------------------------------------|--------------------------------------------------|
|            | R_SO2tpp      | no  | no  | yes | s0001                                             | -                                                |
|            | R_SOTA        | no  | no  | no  | b1748                                             | -                                                |
| 2.3.1.57   | R_SPMDAT1     | no  | no  | no  | b1584                                             | -                                                |
| 2.3.1.57   | R_SPMDAT2     | no  | no  | no  | b1584                                             | -                                                |
| 2.5.1.16   | R_SPMS        | no  | no  | no  | b0121                                             | DB02844,                                         |
| 1.15.1.1   | R_SPODMpp     | no  | no  | no  | b1646                                             | DB03297,DB03382,DB04184,DB04436,                 |
| 1.2.1.16   | R_SSALy       | no  | no  | no  | b2661                                             | -                                                |
| 6.2.1.26   | R_SUCBZL      | no  | no  | no  | b2260                                             | -                                                |
|            | R_SUCBZS      | no  | no  | no  | b2261                                             | -                                                |
|            | R_SUCct2_2pp  | no  | no  | no  | b3528                                             | -                                                |
| 1.3.99.1   | R_SUCDi       | no  | no  | no  | ( b0721 and b0722 and b0723 and b0724 )           | DB00730,DB03014,DB03343,DB04631,                 |
| 6.2.1.5    | R_SUCOAS      | no  | no  | no  | ( b0728 and b0729 )                               | -                                                |
|            | R_SUCptsp     | no  | no  | no  | ( b2417 and b2429 and b2415 and b2416 )           | -                                                |
|            | R_SULFACabcpp | no  | no  | no  | ( b0936 and b0933 and b0934 )                     | -                                                |
| 1.8.2.2    | R_SULRi       | no  | yes | no  | ( b2763 and b2764 )                               | -                                                |
|            | R_T2DECAI     | yes | yes | no  | b0954                                             | -                                                |
| 1.1.1.58   | R_TAGURr      | no  | no  | no  | b1521                                             | -                                                |
| 4.2.1.32   | R_TARTD       | no  | no  | no  | ( b3061 and b3062 )                               | -                                                |
|            | R_TARTRt7pp   | no  | no  | no  | b3063                                             | -                                                |
| 1.14.11.17 | R_TAUDO       | no  | no  | no  | b0368                                             | DB03806,                                         |
|            | R_TAURabcpp   | no  | no  | no  | ( b0365 and b0366 and b0367 )                     | -                                                |
| 5.3.3.8    | R_TDECOAI     | no  | no  | no  | b3846                                             | -                                                |
| 3.6.1.15   | R_TDP         | no  | no  | no  | b1134                                             | DB01720,DB02331,DB03388,DB03605,DB03647,DB04298, |
|            | R_TDPADGAT    | no  | no  | no  | b3790                                             | -                                                |
| 2.6.1.33   | R_TDPAGTA     | no  | no  | no  | b3791                                             | -                                                |
| 5.1.3.13   | R_TDPDRE      | no  | no  | no  | b2038                                             | DB02549,DB03161,DB03751,DB04530,                 |
| 1.1.1.133  | R_TDPDRR      | no  | no  | no  | b2040                                             | -                                                |
| 2.7.1.130  | R_TDSK        | yes | yes | yes | b0915                                             | -                                                |
|            | R_TDSR1       | no  | no  | no  | ( b2893 and b4136 )                               | -                                                |
|            | R_TDSR2       | no  | no  | no  | ( b4136 and b0604 )                               | -                                                |
| 1.6.1.1    | R_THD2pp      | no  | no  | no  | ( b1602 and b1603 )                               | -                                                |
| 2.3.1.117  | R_THDPS       | yes | yes | no  | b0166                                             | DB03134,DB03905,                                 |
|            | R_THIORDXi    | no  | no  | no  | (( b2480 and b2582 ) or ( b2480 and b3781 ))      | -                                                |
|            | R_THMabcpp    | no  | no  | no  | ( b0068 and b0067 and b0066 )                     | -                                                |
|            | R_THMDt2rpp   | no  | no  | no  | b2406                                             | -                                                |
|            | R_THRabcpp    | no  | no  | no  | ( b3454 and b3455 and b3457 and b3460 and b3456 ) | -                                                |
| 1.1.1.103  | R_THRD        | no  | no  | no  | b3616                                             | -                                                |
| 4.2.3.1    | R_THRS        | no  | yes | no  | b0004                                             | -                                                |
|            | R_THRt2rpp    | no  | no  | no  | b3116                                             | -                                                |
|            | R_THRt4pp     | no  | no  | no  | b3089                                             | -                                                |
| 6.1.1.3    | R_THRTRS      | yes | no  | yes | b1719                                             | DB03355,DB03869,DB04024,                         |



|          |              |     |     |     |                                                                                      |                                                                                                                                                                  |
|----------|--------------|-----|-----|-----|--------------------------------------------------------------------------------------|------------------------------------------------------------------------------------------------------------------------------------------------------------------|
|          | R_THZPSN     | no  | yes | no  | ( b2530 and b3992 and ( b3990 and b3991 ) and b0423 and b4407 )                      | -                                                                                                                                                                |
|          | R_TMAOR2     | no  | no  | no  | ( b0894 and b0895 and b0896 )                                                        | -                                                                                                                                                                |
| 2.7.1.21 | R_TMDK1      | no  | no  | no  | b1238                                                                                | DB00194,DB00299,DB00432,DB00577,DB00787,DB01004,DB01730,DB02324,DB02452,DB02495,DB02500,DB02765,DB02921,DB03000,DB03280,DB03312,DB03778,DB03804,DB04139,DB04438, |
| 2.4.2.4  | R_TMDPP      | no  | no  | yes | b4382                                                                                | DB02631,                                                                                                                                                         |
| 2.1.1.45 | R_TMDS       | no  | yes | no  | b2827                                                                                | DB00432,DB01099,DB02223,DB02301,DB02467,DB02752,DB02899,DB03038,DB03157,DB03274,DB03541,DB03558,DB03761,DB03800,DB03818,DB04447,DB04503,DB04530,DB04696,         |
| 2.7.1.89 | R_TMK        | no  | no  | no  | b1106                                                                                | -                                                                                                                                                                |
| 2.7.4.16 | R_TMPK       | yes | yes | no  | b0417                                                                                | -                                                                                                                                                                |
| 2.5.1.3  | R_TMPPP      | no  | yes | no  | b3993                                                                                | DB01788,DB02212,DB02254,DB02885,DB03145,                                                                                                                         |
| 5.3.1.1  | R_TPI        | no  | no  | no  | b3919                                                                                | DB01695,DB01709,DB01779,DB02515,DB02764,DB03026,DB03132,DB03135,DB03314,DB03379,DB03900,DB04184,DB04326,DB04447,                                                 |
|          | R_TPRDCOAS   | no  | no  | no  | b0613                                                                                | -                                                                                                                                                                |
| 3.2.1.93 | R_TRE6PH     | no  | no  | no  | b4239                                                                                | -                                                                                                                                                                |
| 3.1.3.12 | R_TRE6PP     | no  | no  | no  | b1897                                                                                | -                                                                                                                                                                |
| 2.4.1.15 | R_TRE6PS     | no  | no  | no  | b1896                                                                                | DB03488,DB04355,                                                                                                                                                 |
| 3.2.1.28 | R_TREH       | no  | no  | no  | b3519                                                                                | -                                                                                                                                                                |
| 3.2.1.28 | R_TREHpp     | no  | no  | no  | b1197                                                                                | -                                                                                                                                                                |
|          | R_TREptspp   | no  | no  | no  | ( b2417 and b2415 and b2416 and b4240 )                                              | -                                                                                                                                                                |
| 4.1.99.1 | R_TRPAS2     | no  | no  | no  | b3708                                                                                | -                                                                                                                                                                |
| 4.2.1.20 | R_TRPS1      | no  | no  | no  | ( b1260 and b1261 )                                                                  | DB03171,                                                                                                                                                         |
| 4.2.1.20 | R_TRPS2      | no  | no  | no  | ( b1260 and b1261 )                                                                  | DB03171,                                                                                                                                                         |
| 4.2.1.20 | R_TRPS3      | no  | no  | no  | ( b1260 and b1261 )                                                                  | DB03171,                                                                                                                                                         |
| 6.1.1.2  | R_TRPTRS     | yes | no  | yes | b3384                                                                                | -                                                                                                                                                                |
|          | R_TSULabcpp  | no  | no  | no  | (( b2422 and b2425 and b2424 and b2423 ) or ( b2422 and b2424 and b2423 and b3917 )) | -                                                                                                                                                                |
|          | R_TTDCAtexi  | no  | no  | no  | b2344                                                                                | -                                                                                                                                                                |
|          | R_TTDCEAtexi | no  | no  | no  | b2344                                                                                | -                                                                                                                                                                |
|          | R_TUNGSabcpp | no  | no  | no  | ( b0763 and b0764 and b0765 )                                                        | -                                                                                                                                                                |
| 1.4.3.6  | R_TYROXDAApp | no  | no  | no  | b1386                                                                                | DB01634,DB01657,DB02511,DB02537,DB02928,DB03631,DB04334,                                                                                                         |
|          | R_TYRPPp     | no  | no  | no  | b4055                                                                                | -                                                                                                                                                                |
| 6.1.1.1  | R_TYRTRS     | yes | no  | yes | b1637                                                                                | DB03325,DB03978,                                                                                                                                                 |
|          | R_U23GAAT    | yes | yes | yes | b0179                                                                                | -                                                                                                                                                                |
| 6.3.2.13 | R_UAAGDS     | yes | yes | yes | b0085                                                                                | -                                                                                                                                                                |

|           |             |     |     |     |                                                   |                                                                  |
|-----------|-------------|-----|-----|-----|---------------------------------------------------|------------------------------------------------------------------|
| 3.6.1.45  | R_UACGALPpp | no  | no  | no  | b0480                                             | -                                                                |
| 3.6.1.45  | R_UACGAMPpp | no  | no  | no  | b0480                                             | -                                                                |
|           | R_UACMAMO   | no  | no  | no  | b3787                                             | -                                                                |
| 5.1.3.14  | R_UAG2E     | no  | no  | no  | b3786                                             | DB02196,                                                         |
| 2.3.1.129 | R_UAGAAT    | yes | yes | no  | ( b1094 and b0181 )                               | -                                                                |
| 2.5.1.7   | R_UAGCVT    | yes | yes | yes | b3189                                             | DB01879,DB02435,DB02995,DB03089,DB03397,DB04174,DB04474,         |
| 2.7.7.23  | R_UAGDP     | yes | yes | no  | b3730                                             | DB02196,DB03397,DB03814,                                         |
|           | R_UAGPT3    | yes | yes | yes | b0090                                             | -                                                                |
| 6.3.2.9   | R_UAMAGS    | yes | yes | no  | b0088                                             | -                                                                |
| 6.3.2.8   | R_UAMAS     | yes | yes | no  | b0091                                             | -                                                                |
| 1.1.1.158 | R_UAPGR     | yes | yes | yes | b3972                                             | -                                                                |
|           | R_UDCPDPS   | yes | yes | no  | b0174                                             | -                                                                |
| 5.1.3.2   | R_UDPG4E    | no  | no  | no  | b0759                                             | DB01861,DB02196,DB02421,DB02790,DB03095,DB03397,DB04097,DB04355, |
| 5.4.99.9  | R_UDPGALM   | no  | no  | no  | b2036                                             | DB03709,                                                         |
| 3.6.1.45  | R_UDPGALPpp | no  | no  | no  | b0480                                             | -                                                                |
| 1.1.1.22  | R_UDPGD     | no  | no  | no  | b2028                                             | DB01713,                                                         |
|           | R_UDPGDC    | no  | no  | no  | b2255                                             | -                                                                |
| 3.6.1.45  | R_UDPGPpp   | no  | no  | no  | b0480                                             | -                                                                |
|           | R_UDPKAAT   | no  | no  | no  | b2253                                             | -                                                                |
| 3.6.1.45  | R_UGLCURPpp | no  | no  | no  | b0480                                             | -                                                                |
| 2.7.7.12  | R_UGLT      | no  | no  | no  | b0758                                             | DB01861,                                                         |
| 3.5.3.19  | R_UGLYCH    | no  | no  | no  | b0505                                             | -                                                                |
| 6.3.2.15  | R_UGMDDS    | yes | yes | yes | b0086                                             | -                                                                |
|           | R_UHGADA    | yes | yes | yes | b0096                                             | -                                                                |
|           | R_ULA4NFT   | no  | no  | no  | b2255                                             | -                                                                |
|           | R_UM3PL     | no  | no  | no  | b4233                                             | -                                                                |
|           | R_UM4PCP    | no  | no  | no  | b1192                                             | -                                                                |
|           | R_UM4PL     | no  | no  | no  | b4233                                             | -                                                                |
|           | R_UPLA4FNT  | no  | no  | no  | b2254                                             | -                                                                |
| 4.2.1.75  | R_UPP3S     | yes | yes | no  | b3804                                             | -                                                                |
| 4.1.1.37  | R_UPPDC1    | no  | yes | yes | b3997                                             | -                                                                |
| 2.4.2.9   | R_UPPRT     | no  | no  | no  | b2498                                             | DB01632,                                                         |
|           | R_URAt2pp   | no  | no  | no  | b2497                                             | -                                                                |
|           | R_URAt2rpp  | no  | no  | no  | b1006                                             | -                                                                |
| 1.1.1.154 | R_URDGLYCD  | no  | no  | no  | b0517                                             | -                                                                |
|           | R_UREAtpp   | no  | no  | no  | b3927                                             | -                                                                |
|           | R_URIDK2r   | yes | no  | no  | b0171                                             | -                                                                |
| 2.7.1.48  | R_URIK2     | no  | no  | no  | b2066                                             | -                                                                |
|           | R_URIt2rpp  | no  | no  | no  | b2406                                             | -                                                                |
|           | R_URItex    | no  | no  | no  | b0411                                             | -                                                                |
|           | R_USHD      | yes | yes | yes | b0524                                             | -                                                                |
|           | R_VALabcpp  | no  | no  | no  | ( b3454 and b3455 and b3457 and b3460 and b3456 ) | -                                                                |
|           | R_VALt2rpp  | no  | no  | no  | b0401                                             | -                                                                |
| 2.6.1.42  | R_VALTA     | no  | no  | no  | b3770                                             | DB01813,DB02142,DB02635,DB03993,DB04063,                         |
| 6.1.1.9   | R_VALTRS    | yes | no  | yes | b4258                                             | -                                                                |
| 2.6.1.66  | R_VPAMT     | no  | no  | no  | b3572                                             | -                                                                |
|           | R_X5PL3E    | no  | no  | no  | b4197                                             | -                                                                |
| 1.1.1.204 | R_XAND      | no  | no  | no  | ( b2866 and b2867 and b2868 )                     | -                                                                |
|           | R_XANt2pp   | no  | no  | no  | b3654                                             | -                                                                |
| 2.4.2.22  | R_XPPT      | no  | no  | no  | b0238                                             | DB03942,                                                         |
| 3.2.2.8   | R_XTSNH     | no  | no  | no  | b0030                                             | -                                                                |
|           | R_XTSNt2rpp | no  | no  | no  | b2406                                             | -                                                                |
|           | R_XYLabcpp  | no  | no  | no  | ( b3566 and b3567 and b3568 )                     | -                                                                |

|         |            |    |    |    |                               |                                                          |
|---------|------------|----|----|----|-------------------------------|----------------------------------------------------------|
| 5.3.1.5 | R_XYL1     | no | no | no | b3565                         | DB01881,DB01914,DB02172,DB02438,DB03206,DB03564,DB03911, |
| 5.3.1.5 | R_XYL2     | no | no | no | b3565                         | DB01881,DB01914,DB02172,DB02438,DB03206,DB03564,DB03911, |
|         | R_XYLt2pp  | no | no | no | b4031                         | -                                                        |
|         | R_XYLt2pp  | no | no | no | ( b3577 and b3578 and b3579 ) | -                                                        |
|         | R_ZN2abcpp | no | no | no | b3469                         | -                                                        |
|         | R_ZN2tpp   | no | no | no | b3040                         | -                                                        |
|         | R_ZNabcpp  | no | no | no | ( b1857 and b1859 and b1858 ) | -                                                        |
